# Supplementary material
Source: PubMed Central journal article supplement (PMC5245580)

## SUPPLEMENTAL MATERIAL

**Table S1: Clinical Indications and Genetic Testing Results – Grouped by Disease Category**

A) Connective Tissue Diseases

| #   | Reason for Referral         | Age | Sex | Variant                                                                  | Variant Previously Reported? | Disease Association                                                                                                                                              | Freq. EXAC (January 2016) | Additional Information                                                                                                                                                                                                                                                                                                  | Pathogenicity                            | ACMG criteria*                                              |
|-----|-----------------------------|-----|-----|--------------------------------------------------------------------------|------------------------------|------------------------------------------------------------------------------------------------------------------------------------------------------------------|---------------------------|-------------------------------------------------------------------------------------------------------------------------------------------------------------------------------------------------------------------------------------------------------------------------------------------------------------------------|------------------------------------------|-------------------------------------------------------------|
| 2   | TAA/AAA (both)              | 65  | M   | <i>SMAD3</i> R243S                                                       | No                           | Yes (Nat Genet 2011;43(2):121-6)                                                                                                                                 | 0                         | R243R in EXAC, personal history of TAA, AAA, tall, lanky, family history of TAA, AAA                                                                                                                                                                                                                                    | Unknown Significance                     | PM2, PP3, PP4                                               |
| 27  | TAA                         | 62  | M   | <i>MYLK</i> R1232C                                                       | No                           | Yes (Am J Hum Genet 2010; 87(5):701-7)                                                                                                                           | 0                         | Actin-binding domain of gene, no curated                                                                                                                                                                                                                                                                                | Unknown Significance                     | PM2, PP3, PP4                                               |
| 29  | TAA                         | 45  | M   | <i>MYLK</i> R55W                                                         | No                           | Yes (Am J Hum Genet 2010; 87(5):701-8)                                                                                                                           | 5.79E-5                   | Did not segregate in family; hot spot R55R, R55Q, R55L all in EXAC none have any ClinVar correlation                                                                                                                                                                                                                    | Unknown Significance                     | BS4                                                         |
| 36  | TAA                         | 57  | M   |                                                                          |                              |                                                                                                                                                                  |                           |                                                                                                                                                                                                                                                                                                                         |                                          |                                                             |
| 47  | TAA                         | 46  | F   |                                                                          |                              |                                                                                                                                                                  |                           |                                                                                                                                                                                                                                                                                                                         |                                          |                                                             |
| 55  | TAA                         | 60  | F   |                                                                          |                              |                                                                                                                                                                  |                           |                                                                                                                                                                                                                                                                                                                         |                                          |                                                             |
| 58  | TAA/family history TAA      | 63  | M   |                                                                          |                              |                                                                                                                                                                  |                           |                                                                                                                                                                                                                                                                                                                         |                                          |                                                             |
| 70  | TAA                         | 32  | M   |                                                                          |                              |                                                                                                                                                                  |                           |                                                                                                                                                                                                                                                                                                                         |                                          |                                                             |
| 74  | TAA                         | 52  | M   |                                                                          |                              |                                                                                                                                                                  |                           |                                                                                                                                                                                                                                                                                                                         |                                          |                                                             |
| 94  | TAA; family history TAA     | 37  | M   |                                                                          |                              |                                                                                                                                                                  |                           |                                                                                                                                                                                                                                                                                                                         |                                          |                                                             |
| 139 | TAA                         | 61  | M   |                                                                          |                              |                                                                                                                                                                  |                           |                                                                                                                                                                                                                                                                                                                         |                                          |                                                             |
| 143 | TAA                         | 61  | M   |                                                                          |                              |                                                                                                                                                                  |                           |                                                                                                                                                                                                                                                                                                                         |                                          |                                                             |
| 148 | TAA                         | 54  | M   |                                                                          |                              |                                                                                                                                                                  |                           |                                                                                                                                                                                                                                                                                                                         |                                          |                                                             |
| 156 | TAA                         | 62  | M   |                                                                          |                              |                                                                                                                                                                  |                           |                                                                                                                                                                                                                                                                                                                         |                                          |                                                             |
| 159 | TAA, Family history of TAAD | 45  | M   |                                                                          |                              |                                                                                                                                                                  |                           |                                                                                                                                                                                                                                                                                                                         |                                          |                                                             |
| 173 | TAA                         | 54  | M   |                                                                          |                              |                                                                                                                                                                  |                           |                                                                                                                                                                                                                                                                                                                         |                                          |                                                             |
| 176 | TAA                         | 61  | F   | <i>MYH11</i> R1805W                                                      | No                           | Yes (Nat Genet 2006; 38(3):343-9)                                                                                                                                | 1.65E-05                  | Family history of valve replacement, brain aneurysm, family members unavailable for segregation                                                                                                                                                                                                                         | Unknown Significance                     | PP3, PP4                                                    |
| 197 | TAA                         | 37  | M   | <i>SKI</i> R489K                                                         | No                           | For Sphrpintzen-Goldberg Craniosynostosis, Marfan Syndrome, or Loeyes-Dietz (Nat Genet 2012;44(11):1249-54)                                                      | 8.871E-06                 | Has aneurysm at Sinus of Valsalva, but no other features of other conditions.                                                                                                                                                                                                                                           | Uncertain Significance                   | PP3, PP4                                                    |
| 6   | PVH; EDS                    | 25  | F   | <i>FLNA</i> 4214delA;<br><i>COL5A1</i><br>D1771N;<br><i>COL5A2</i> G702R | No; No; No                   | Yes (Neurology 2005;64(2):254-262; Yes (Am J Med Genet C Semin Med Genet 2005;139C(1):17-23); Yes (J Med Genet 1998;35:846-8)                                    | 0;<br>0;<br>1.663E-5      | Family segregation done - Dad had <i>COL5A1</i> , but no phenotype, Mom has <i>COL5A2</i> with phenotype, <i>FLNA</i> de novo, sister has <i>COL5A1/2</i> and phenotype, brother has <i>COL5A2</i> and phenotype, maternal grandmother has <i>COL5A2</i> , history of aneurysm; D1771G in EXAC 1 time; predicted benign | Pathogenic;<br>Benign; Likely Pathogenic | PS2, PM2;BS2, BS4; PM2, PP1(family well-characterized), PP3 |
| 157 | EDS                         | 33  | M   | <i>ELN</i> G3V                                                           | No                           | No for Williams Syndrome (Cell 1993; 73:159-68), Cutis Laxa (Am J Med Genet 2008;146A:977-83), and Supravalvular Aortic Stenosis (J Clin Invest 1994;93:1071-77) | 0                         | G3G in EXAC                                                                                                                                                                                                                                                                                                             | Unknown Significance                     | PM2, PP3                                                    |

|     |                 |    |   |                                   |                                                 |                                                                           |                      |                                                                                                                                                                                                 |                                            |                         |
|-----|-----------------|----|---|-----------------------------------|-------------------------------------------------|---------------------------------------------------------------------------|----------------------|-------------------------------------------------------------------------------------------------------------------------------------------------------------------------------------------------|--------------------------------------------|-------------------------|
| 158 | EDS             | 35 | F |                                   |                                                 |                                                                           |                      |                                                                                                                                                                                                 |                                            |                         |
| 160 | EDS             | 62 | F | <i>COL1A1 R763H</i>               | No                                              | Yes (Am J Hum Genet 2000;66:1398-1402)                                    | 4.954E-05            | Sister has similar symptoms, but untested. G764 is a variant reported to cause osteogenesis imperfecta type 2. In triple helical region of gene                                                 | Unknown Significance                       | PP2, PP3, PP4           |
| 16  | Marfan syndrome | 26 | F | <i>FBNI IVS2+1G&gt;A</i>          | Yes (http://www.umd.be/FBNI/4DACTION/W_DMDT1/1) | Yes (Proc Natl Acad Sci USA 1992;89(13):5917-22)                          | 0                    | Family has clinical phenotype: Brother, mother untested                                                                                                                                         | Pathogenic                                 | PVS1, PM2, PM3          |
| 20  | Marfan syndrome | 27 | M |                                   |                                                 |                                                                           |                      |                                                                                                                                                                                                 |                                            |                         |
| 31  | Marfan syndrome | 55 | F | <i>FBNI G77X</i>                  | Yes(http://www.umd.be/FBNI/4DACTION/W_DM DT1/1) | Yes (Proc Natl Acad Sci USA 1992;89(13):5917-21)                          | 0                    | Family has clinical phenotype, son was given Marfan clinical diagnosis as a child, but no genetic testing                                                                                       | Pathogenic                                 | PVS1, PM2, PM4          |
| 34  | Marfan syndrome | 21 | M | <i>TGFBR2 V387M</i>               | Yes (ClinVar, Hum Mutat 2006;27(8):760-9)       | Yes(Hum Mutat 2006;27(8):760-9, Hum Mutat 2008; 29(11):E284-95)           | 0                    | Mild phenotype - tall lanky                                                                                                                                                                     | Likely Benign                              | BS3, BP6                |
| 42  | Marfan syndrome | 64 | F | <i>FBNI D1485G</i>                | No                                              | Yes (Nat Genet 1995; 11(4):456-8)                                         | 2.997E-4             | D1485N also in EXAC, segregation in family; son has similar phenotype and same genotype                                                                                                         | Unknown Significance                       | PP1, PP3                |
| 51  | Marfan syndrome | 53 | F |                                   |                                                 |                                                                           |                      |                                                                                                                                                                                                 |                                            |                         |
| 85  | Marfan syndrome | 57 | F | <i>FBNI R945C</i>                 | No                                              | Yes (Genomics 1993;17(2):468-75)                                          | 0                    | R954H in ClinVar as Pathogenic, son died of ruptured TAA, prompted testing                                                                                                                      | Likely Pathogenic                          | PM2, PM5, PP3, PP4      |
| 33  | Noonan syndrome | 24 | M | <i>PTPN11 I309V; MYH11 V87L</i>   | Yes (ClinVar);No                                | Yes(Am J Hum Genet 2002; 70(6):1555-63); Yes (Nat Genet 2006; 38(3):343-9 | 4.119E-4; 0          | I homozygous in EXAC for I309V; V87 in myosin motor domain of MYH11, Dad, sister has some features, but untested                                                                                | Likely Benign; Unknown Significance        | BS3, BP4, PB5, BP6; PM2 |
| 38  | SCAD            | 60 | F |                                   |                                                 |                                                                           |                      |                                                                                                                                                                                                 |                                            |                         |
| 98  | SCAD            | 28 | M |                                   |                                                 |                                                                           |                      |                                                                                                                                                                                                 |                                            |                         |
| 103 | SCAD            | 63 | M |                                   |                                                 |                                                                           |                      |                                                                                                                                                                                                 |                                            |                         |
| 178 | SCAD            | 43 | F | <i>COL5A2 R1106W, FBNI A2025S</i> | Yes (ClinVar); Yes (ClinVar)                    | For EDS (J Med Genet 1998;35:846-8); For SCAD (Heart 2016;102:878-881)    | 0.0004982; 0.0004622 | Patient was post-partum with event and is hyperflexible, mother has similar symptoms (coronary stent w/o CAD and hyperflexible), patient also has had cerebral aneurysm <1 year post SCAD       | Unknown Significance; Unknown Significance | PP3; PP3                |
| 186 | SCAD            | 36 | F |                                   |                                                 |                                                                           |                      |                                                                                                                                                                                                 |                                            |                         |
| 188 | SCAD            | 52 | M | <i>FBNI D2757N</i>                | No                                              | Yes (J Am Coll Cardiol 2016;67(23):2744-54, Heart 2016;102:878-881)       | 0                    | Patient also had splenic infarction, celiac artery aneurysm, renal artery aneurysm, has some flexibility, has family history of stroke and "heart attack". Variant in carboxyl terminal of gene | Uncertain Significance                     | PM2, PP3                |
| 190 | SCAD            | 60 | F |                                   |                                                 |                                                                           |                      |                                                                                                                                                                                                 |                                            |                         |

## B) Sudden Cardiac Death (SCD)

| #  | Reason for Referral | Age | Sex | Variant           | Variant Previously Reported? | Disease Association                      | Freq. EXAC (January 2016) | Additional Information                                                                                       | Pathogenicity | ACMG criteria*          |
|----|---------------------|-----|-----|-------------------|------------------------------|------------------------------------------|---------------------------|--------------------------------------------------------------------------------------------------------------|---------------|-------------------------|
| 4  | SCD (RCM)           | 54  | F   | <i>TNN3 L198V</i> | Yes(ClinVar)                 | Yes (Neth Heart J 2011; 19(7-8): 344-51) | 0                         | Causes a change in splice site                                                                               | Pathogenic    | PM2, PM4, PP3, PP5      |
| 11 | SCD                 | 51  | F   |                   |                              |                                          |                           |                                                                                                              |               |                         |
| 12 | SCD                 | 66  | F   | <i>KCNH2 N33T</i> | No                           | Yes (Circulation 2002; 105(7):794-9)     | 0                         | 2 submissions in ClinVar - Gene DX pathogenic, NHS VUS, this mutation increased rate of deactivation several | Pathogenic    | PS3, PM1, PM2, PP3, PP5 |

|     |                         |    |   |                                                                  |                                                                                      |                                                                                                                              |                             |                                                                                                                                                                                        |                                                                                          |                              |
|-----|-------------------------|----|---|------------------------------------------------------------------|--------------------------------------------------------------------------------------|------------------------------------------------------------------------------------------------------------------------------|-----------------------------|----------------------------------------------------------------------------------------------------------------------------------------------------------------------------------------|------------------------------------------------------------------------------------------|------------------------------|
|     |                         |    |   |                                                                  |                                                                                      |                                                                                                                              |                             | papers; family segregation done unaffected do not have variant                                                                                                                         |                                                                                          |                              |
| 13  | SCD                     | 61 | M | <i>DPP6</i> D801N                                                | No                                                                                   | Yes (Am J Hum Genet 2009;84(4):468-76)                                                                                       | 0                           | Segregation done on family, but since idiopathic VF, no phenotypic information                                                                                                         | Unknown Significance                                                                     | PM2, PP3                     |
| 19  | SCD (HCM)               | 58 | M | <i>MYBPC3</i> IVS28+22T>G                                        | No                                                                                   | Yes (Circulation 2003; 107(17):2227-32)                                                                                      | 0                           | Family segregation done - children without phenotype and do not carry mutation                                                                                                         | Pathogenic                                                                               | PVS1, PM2, PP1, PP3          |
| 21  | SCD (DCM)               | 47 | F | <i>LMNA</i> S595R;<br><i>MYH6</i> R1636C                         | No; Yes (ClinVar)                                                                    | Yes (Eur J Heart Fail 2013; 15(6):628-37; Yes (Circulation 2005;112(1):54-9)                                                 | 0;<br>4.2E-4                | EXAC also has R1636H                                                                                                                                                                   | Unknown Significance;<br>Likely Benign                                                   | PM2, PP3; BP4, BP6           |
| 26  | SCD (Non-specific NICM) | 47 | F | <i>TTN</i> R18966X;<br><i>NEXN</i> E205K                         | No; Yes (ClinVar)                                                                    | Yes (N Engl J Med 2012; 366(7): 619-28); Yes (Am J Hum Genet 2010; 87(5):687-93)                                             | 0; 1.9E-4                   | 2 reports in ClinVar both unknown significance for NEXN variant, NEXN variant in Glu rich region.                                                                                      | Pathogenic;<br>Unknown Significance                                                      | PVS1, PM2, PM4; PP3          |
| 30  | SCD                     | 21 | M | <i>DSG2</i> V56M                                                 | Yes (ClinVar)                                                                        | Yes for ARVC (Eur Heart J 2007; 28(5):581-8)                                                                                 | 1.873E-3                    | Reported not likely pathogenic for ARVC (Nat Clin Cardiovasc Med 2008;5(12):E1)                                                                                                        | Likely Benign                                                                            | BS3, BP6,                    |
| 32  | SCD (HCM)               | 26 | M |                                                                  |                                                                                      |                                                                                                                              |                             |                                                                                                                                                                                        |                                                                                          |                              |
| 44  | SCD, TdP, LQTS          | 42 | F | <i>SCN5A</i> L461V                                               | Yes (ClinVar)                                                                        | Yes (Heart Rhythm 2010;7(1):33-46)                                                                                           | 0.01163                     | L461L in EXAC; Reported Polymorphism in Heart Rhythm 2010;7(1):33-46                                                                                                                   | Likely Benign                                                                            | BS1, BP4, BP5                |
| 54  | SCD (DCM)               | 47 | F | <i>DSP</i> Q1672X                                                | No                                                                                   | Yes for ARVC (Can J Cardiol 2014;30(12):1655-61), For DCM (Genet Med 2014; 16(8):601-8)                                      | 0                           |                                                                                                                                                                                        | Pathogenic                                                                               | PVS1, PM2, PM4               |
| 59  | SCD (Non-Specific NICM) | 24 | F | <i>TTN</i> c.45689delG;<br><i>MYH6</i> R1270C                    | No; No                                                                               | Yes (N Engl J Med 2012; 366(7):619-28, Sci Transl Med 2015; 7(270):270ra6); Yes (Circulation 2005;112(1):54-9)               | 0; 5.766E-5                 | R1270H also in EXAC; segregation done on family - Dad carries <i>MYH6</i> only without disease; sister carries both mutations                                                          | Pathogenic; Benign                                                                       | PVS1, PM2; BS2, BS4, BP5     |
| 63  | SCD (Non-Specific NICM) | 29 | M |                                                                  |                                                                                      |                                                                                                                              |                             |                                                                                                                                                                                        |                                                                                          |                              |
| 65  | SCD                     | 47 | F | <i>SCN5A</i> S216L;<br><i>DSG2</i> 12-2 A>G                      | Yes (ClinVar, Clin Transl Sci 2008;1(1):21-26); Yes (Circulation 2006;113:1171-1179) | Yes (Heart Rhythm 2010;7(1):33-46); Yes (Circulation 2006;113:1171-1179)                                                     | 0.001;0                     | <i>DSG2</i> mutation may not be sufficient to cause disease                                                                                                                            | Likely Pathogenic;<br>Likely Benign                                                      | PS3, PP3, PP4;<br>BS3, BP2   |
| 68  | SCD                     | 60 | F |                                                                  |                                                                                      |                                                                                                                              |                             |                                                                                                                                                                                        |                                                                                          |                              |
| 75  | SCD (DCM)               | 40 | F | <i>TTN</i> c.29042-2A>C                                          | Yes (Sci Transl Med 2015; 7(270):270ra6)                                             | Yes (N Engl J Med 2012; 366(7):619-28, Sci Transl Med 2015; 7(270):270ra6)                                                   | 0                           | VF arrest, family unavailable for testing                                                                                                                                              | Pathogenic                                                                               | PVS1, PM2, PM4               |
| 77  | SCD (LQTS)              | 78 | M |                                                                  |                                                                                      |                                                                                                                              |                             |                                                                                                                                                                                        |                                                                                          |                              |
| 79  | SCD (ARVC)              | 22 | M | <i>SCN5A</i> V1951L;<br><i>PNN</i> I331(GAGdel)                  | Yes (ClinVar, Heart Rhythm 2004;1(5):600-7); No                                      | Yes for BrS (Heart Rhythm 2010;7(1):33-46);                                                                                  | 5.412E-3;0                  | V1951L has 6 homozygotes in EXAC, reported polymorphism, V1951M in EXAC and Pathogenic in ClinVar, most ClinVar reports for V1951L are benign likely benign;                           | Benign; Unknown Significance                                                             | BS2, BS3, BP4, BP6; PM2      |
| 83  | SCD (LQTS)              | 60 | F | <i>ANK2</i> V3634D;<br><i>AKAP9</i> R1285G;<br><i>GYG1</i> Y282S | Yes (ClinVar); No; No                                                                | Yes (Nature 2003;421:633-639, Proc Natl Acad Sci USA 2007;104(52):20990-5)                                                   | 2.738E-4; 1.048E-5; 0       | V3646I in EXAC, ClinVar reports V3634I as pathogenic; AKAP9 variant also known as R1246G; GYG1 Y282X in EXAC 8.238E-06, both heterozygous variants                                     | Unknown Significance;<br>Unknown Significance;<br>Unknown Significance                   | PM5, PP3; BP4; PM2           |
| 84  | SCD (DCM)               | 40 | M | <i>TTN</i> W21280X                                               | No                                                                                   | Yes (N Engl J Med 2012; 366(7):619-28)                                                                                       | 0                           | Family segregation, Dad same phenotype and genotype                                                                                                                                    | Pathogenic                                                                               | PVS1, PM2, PM4, PP1          |
| 90  | SCD (DCM)               | 19 | M | <i>MYPN</i> L867I,<br><i>RBM20</i> F510S,<br><i>ACTN2</i> D475N  | Yes (ClinVar); No; Yes (ClinVar)                                                     | Yes (Cardiovasc Res 2008;77(1):118-125); Yes (Clin Transl Sci 2010; 3(3):90-7); Yes (Circ Cardiovasc Genet 2014;7(6):741-50) | 3.296E-3; 9.39E-5; 7.229E-3 | <i>MYPN</i> variant has 5 homozygous, 2 reports in ClinVar with no pathogenicity (uncertain significance); 45 homozygotes for <i>ACTN2</i> variant and 3 reports in ClinVar all benign | Unknown Significance;<br>Unknown Significance;<br>Unknown Significance;<br>Likely Benign | PP3; PP3; BP4, BP5, BP6      |
| 127 | SCD                     | 52 | F |                                                                  |                                                                                      |                                                                                                                              |                             |                                                                                                                                                                                        |                                                                                          |                              |
| 131 | SCD (CPVT)              | 50 | F | <i>RYR2</i> Y2553C;<br><i>AKAP9</i> G3816V                       | No; No                                                                               | Yes (Heart Rhythm 2015;12(7):1636-43); Yes (Proc Natl Acad Sci USA 2007;104(52):20990-5)                                     | 0;0                         | Y2553Y in EXAC, segregation done on children; both have AKAP9 mutation and not RYR2                                                                                                    | Unknown Significance;<br>Unknown Significance                                            | PM2, PP3, BS4; PM2, PP1, PP3 |

|     |                             |    |   |                                            |                                                    |                                                                                                 |           |                                                                                                                                                                                                                                                                                                                                     |                                    |                     |
|-----|-----------------------------|----|---|--------------------------------------------|----------------------------------------------------|-------------------------------------------------------------------------------------------------|-----------|-------------------------------------------------------------------------------------------------------------------------------------------------------------------------------------------------------------------------------------------------------------------------------------------------------------------------------------|------------------------------------|---------------------|
| 132 | SCD                         | 37 | M | <i>NEXN</i> E407Q                          | No                                                 | Yes (Am J Hum Genet 2010; 87(5):687-93)                                                         | 0         | In frame deletion in EXAC at E407, no clinical significance                                                                                                                                                                                                                                                                         | Unknown Significance               | PM2, BP4            |
| 136 | SCD                         | 34 | F |                                            |                                                    |                                                                                                 |           |                                                                                                                                                                                                                                                                                                                                     |                                    |                     |
| 137 | SCD (HCM)                   | 40 | F |                                            |                                                    |                                                                                                 |           |                                                                                                                                                                                                                                                                                                                                     |                                    |                     |
| 138 | SCD                         | 26 | M | <i>TGFB3</i> Y390F                         | No                                                 | No for LDS/FTAAD (Am J Med Genet A 2013; 161A(8): 2040-6, J Am Col Cardiol 2015;65(13):1324-36) | 0         | No genotype/phenotype correlation known                                                                                                                                                                                                                                                                                             | Unknown Significance               | PM2                 |
| 140 | SCD (LQTS)                  | 32 | F | <i>ANK2</i> D2445G                         | No                                                 | Yes (Nature 2003;421:633-639)                                                                   | 8.25E-6   |                                                                                                                                                                                                                                                                                                                                     | Unknown Significance               | PP3, PP4            |
| 144 | SCD                         | 23 | M |                                            |                                                    |                                                                                                 |           |                                                                                                                                                                                                                                                                                                                                     |                                    |                     |
| 147 | SCD                         | 37 | F |                                            |                                                    |                                                                                                 |           |                                                                                                                                                                                                                                                                                                                                     |                                    |                     |
| 152 | Congenital hearing loss/TdP | 34 | F | <i>CACNA1D</i> R1902X                      | No                                                 | Homozygous Inframe insertion (Nat Neurosci 2011;14(1):77-84);                                   | 0         | Possible dominant negative effect                                                                                                                                                                                                                                                                                                   | Likely Pathogenic                  | PM2, PM4, PM6, PP4  |
| 163 | SCD; TdP                    | 57 | M | <i>CACNA1D</i> c.5827_5829 (F1943del)      | Yes (ClinVar)                                      | Homozygous Inframe insertion (Nat Neurosci 2011;14(1):77-84)                                    | 0.002542  | Patient also has bradycardia. Sister (unaffected) does not have variant. Reported benign in ClinVar                                                                                                                                                                                                                                 | Likely Benign                      | BS1, BS4, BP6       |
| 165 | SCD                         | 18 | M | <i>MYPN</i> R955W                          | Yes (ClinVar, Eur J Hum Genet 2013; 21(3):294-300) | For cardiomyopathy (Cardiovas Res 2008; 77(1):118-25 and J Am Col Cardiol 2014;64(25):2765-76). | 0.0004287 | ClinVar conflicting interpretations – 1 likely benign, 1 likely pathogenic, 2 uncertain significance, segregation in family – Dad has variant, but no cardiomyopathy and/or arrhythmia, patient had normal cMR. Eur J Hum Genet paper R955W suspected of being disease causing, variant in $\alpha$ -actinin binding region of gene | Uncertain Significance             | PP3                 |
| 170 | SCD                         | 25 | F | <i>SCN5A</i> A572D                         | Yes (ClinVar, Genet Test 2003;7(1):57-61)          | Yes (Genet Test 2003;7(1):57-61, Heart Rhythm 2010;7(7):912-9)                                  | 0.004304  | A572V in EXAC, did not segregate in family, ClinVAR 5 likely benign, 1 likely pathogenic                                                                                                                                                                                                                                            | Benign                             | BS3, BS4, BP4       |
| 193 | SCD                         | 54 | M | <i>RYR2</i> S3349L; <i>TTN</i> c.90223delG | No; No                                             | Yes(Circulation 2002;106:69-74); Yes(N Engl J Med 2012; 366(7): 619-28)                         | 0; 0      | Cardiac event was VF arrest, brother had cardiac arrest as well. RYR2 S3349T in EXAC no clinical information; TTN variant found in A band of gene                                                                                                                                                                                   | Uncertain Significance; Pathogenic | PM2, PP3; PVS1, PM2 |

### C) Hypertrophic Cardiomyopathy (HCM)

| #  | Reason for Referral                                                | Age | Sex | Variant                               | Variant Previously Reported?     | Disease Association                                                                                               | Freq. EXAC (January 2016) | Additional Information                                                         | Pathogenicity                           | ACMG criteria*          |
|----|--------------------------------------------------------------------|-----|-----|---------------------------------------|----------------------------------|-------------------------------------------------------------------------------------------------------------------|---------------------------|--------------------------------------------------------------------------------|-----------------------------------------|-------------------------|
| 7  | HCM                                                                | 46  | M   |                                       |                                  |                                                                                                                   |                           |                                                                                |                                         |                         |
| 8  | HCM                                                                | 60  | M   | <i>TPM1</i> D175N                     | Yes (Ann Med. 2013; 45(1):85-90) | Yes (Ann Med. 2013; 45(1):85-90)                                                                                  | 0                         |                                                                                | Pathogenic                              | PS3, PP3, PP4, PP5      |
| 10 | HCM (apical variant), syncope, bradycardia, conduction abnormality | 73  | F   | <i>TRPM4</i> Q752X                    | No                               | No, only missense mutations reported (J Clin Invest 2009; 119(9):2737-44, Circ Cardiovasc Genet 2010;3(4):374-85) | 1.833E-3                  | Dominant negative mutations exist - D984A (J Biol Chem 2005;280(24):22899-906) | Pathogenic                              | PVS1, PS3               |
| 23 | HCM                                                                | 47  | M   | <i>MYH6</i> I753T                     | No                               | Yes (Circulation 2005;112(1):54-9)                                                                                | 3.30E-5                   | This has been segregated in family, son has variant and some LVH               | Unknown Significance                    | PP3                     |
| 37 | HCM (apical variant)                                               | 57  | M   |                                       |                                  |                                                                                                                   |                           |                                                                                |                                         |                         |
| 41 | HCM                                                                | 48  | M   |                                       |                                  |                                                                                                                   |                           |                                                                                |                                         |                         |
| 46 | HCM                                                                | 57  | M   | <i>MYBPC3</i> c.2554_2555insT         | No                               | Yes (Circulation 2003; 107(17): 2227-32)                                                                          | 1.69E-5                   | Family segregation done - son has genotype and clinical disease                | Pathogenic                              | PVS1, PM4, PP1          |
| 50 | HCM (Family history HCM)                                           | 33  | F   | <i>MYH6</i> V39M                      | Yes (ClinVar)                    | Yes (Circulation 2005;112(1):54-9)                                                                                | 9.06E-5                   | Family history of SCD with autopsy showing LVH                                 | Unknown Significance                    | PP3                     |
| 52 | HCM                                                                | 42  | M   | <i>TNNT2</i> c.477delCTC              | No                               | Yes(N Engl J Med 1995;232(16):1058-64)                                                                            | 0                         | Segregated with disease in NEJM paper                                          | Pathogenic                              | PVS1, PM2, PM4          |
| 53 | HCM                                                                | 58  | M   | <i>MYH6</i> R34C; <i>MYBPC3</i> V219L | No; Yes (ClinVar)                | Yes (Circulation 2005;112(1):54-9); Yes (Circulation 2003; 107(17):2227-32)                                       | 2.471E-5; 0               | R34H also in EXAC, V219F in EXAC - considered pathogenic in ClinVar            | Unknown Significance; Likely Pathogenic | PP3;PM2, PM5, PP1, PP3, |

|     |              |    |   |                                                                                    |                                                                                                                                                                         |                                                                                                                                                                                                                                                       |                     |                                                                                                                                                                              |                                                                 |                                                  |
|-----|--------------|----|---|------------------------------------------------------------------------------------|-------------------------------------------------------------------------------------------------------------------------------------------------------------------------|-------------------------------------------------------------------------------------------------------------------------------------------------------------------------------------------------------------------------------------------------------|---------------------|------------------------------------------------------------------------------------------------------------------------------------------------------------------------------|-----------------------------------------------------------------|--------------------------------------------------|
| 76  | HCM          | 62 | M | <i>MYBPC3</i> R820Q                                                                | Yes (ClinVar)                                                                                                                                                           | Yes (Circulation 2003; 107(17):2227-32, J Am Coll Cardiol 2003; 41(5):781-6)                                                                                                                                                                          | 1.66E-5             | R820P and R820W also in ClinVar, both have uncertain significance, R820Q is pathogenic/likely pathogenic in ClinVar R820W also in EXAC                                       | Pathogenic                                                      | PS3, PS4, PP5                                    |
| 86  | HCM          | 56 | M | <i>MYBPC3</i> V598S                                                                | No                                                                                                                                                                      | Yes (Circulation 2003; 107(17):2227-32)                                                                                                                                                                                                               | 0                   | V598Sfs is pathogenic in ClinVar single submission with clinical assertion information                                                                                       | Likely Pathogenic                                               | PM2, PP3, PP4                                    |
| 93  | HCM          | 23 | M | <i>TNNT2</i> A202T;<br><i>TCAP</i> S64L;<br><i>CALR3</i> R356L                     | No;<br>Yes(ClinVar)<br>; No                                                                                                                                             | Yes(Cell 1994; 77(5):701-12;Yes(Clin Tranl Sci 2010; 3(3):90-7);Yes(J Mol Cell Cardiol 2007;43(3):337-43)                                                                                                                                             | 0; 1.14E-3; 2.207E- | <i>TCAP</i> S64 has 2 homozygotes and multiple reports in ClinVar with a benign pathogenicity; R356 in <i>CALR3</i> hotspot R/H, R/C, R/G also seen, R365L has 6 homozygotes | Unknown Significance;<br>Likely Benign;<br>Unknown Significance | PM2; BP4, BP6;<br>BP4                            |
| 104 | HCM          | 56 | F | <i>TNNT2</i> A202T                                                                 | No                                                                                                                                                                      | Yes (Cell 1994; 77(5):701-12)                                                                                                                                                                                                                         | 0                   | Alternate isoform - intronic in canonical common alteration 0.01224 in EXAC (intronic mutation)                                                                              | Unknown Significance                                            | PM2, BP4                                         |
| 105 | HCM          | 24 | M | <i>MYBPC3</i> V189I                                                                | Yes(ClinVar)                                                                                                                                                            | Yes (Circulation 2003; 107(17):2227-32)                                                                                                                                                                                                               | 2.80E-03            | 4 homozygotes in EXAC, 4 total reports in ClinVar, 2 likely benign, 2 unknown significance                                                                                   | Likely Benign                                                   | BP4, BP6                                         |
| 112 | HCM          | 65 | F | <i>TNNT2</i> ΔGlu160                                                               | Yes(N Engl J Med 1995;232(16):1058-64                                                                                                                                   | Yes(N Engl J Med 1995;232(16):1058-64                                                                                                                                                                                                                 | 0                   |                                                                                                                                                                              | Pathogenic                                                      | PVS1, PM2, PM4                                   |
| 117 | HCM          | 52 | M | <i>MYH7</i> T1377M;<br><i>MYBPC3</i> A522V; <i>AKAP9</i> D2381G; <i>TTN</i> R2262Q | Yes (Circulation 2003; 107(17):2227-32, J Cardiovasc Med (Hagerstown) 2006;7(8):601-17, J Am Coll Cardiol 2004;44(3):602-10, J Med Genet 2011; 48(8):572-6); No; No; No | Yes(Circulation 2003; 107(17):2227-32, J Cardiovasc Med (Hagerstown) 2006;7(8):601-17, J Am Coll Cardiol 2004;44(3):602-10, J Med Genet 2011; 48(8):572-6); Yes (Proc Natl Acad Sci USA 2007; 104(52):20990-5); No (N Engl J Med 2012; 366(7):619-28) | 0; 2.94E-5; 0; 0    | T1377M reported multiple cases of HCM without controls having mutations; A522T in ClinVar and called likely benign by all 5 reports                                          | Pathogenic; Likely Benign; Unknown Significance; Likely Benign  | PS4, PM2, PP2, PP3, PP4; BP4, BP5; BP5; BP1, BP5 |
| 118 | HCM          | 61 | M | <i>TNNT2</i> R285C                                                                 | Yes (ClinVar, N Engl J Med 1995;332(16):1058-64                                                                                                                         | Yes (N Engl J Med 1995; 232(16):1058-64                                                                                                                                                                                                               | 0                   | Did not segregate in family - brother has similar symptoms, but no other mutation found                                                                                      | Unknown Significance                                            | PM2, PP5, BS4                                    |
| 119 | HCM          | 56 | F |                                                                                    |                                                                                                                                                                         |                                                                                                                                                                                                                                                       |                     |                                                                                                                                                                              |                                                                 |                                                  |
| 121 | HCM          | 69 | M |                                                                                    |                                                                                                                                                                         |                                                                                                                                                                                                                                                       |                     |                                                                                                                                                                              |                                                                 |                                                  |
| 123 | HCM          | 39 | F | <i>ABCC9</i> IVS17-1G>A                                                            | No                                                                                                                                                                      | Yes for DCM, (Nat Genet 2004;36:382-387)                                                                                                                                                                                                              | 1.62E-3             | Splice prediction loss of exon 17, radical mutations reported elsewhere, but closer to c-terminal of gene                                                                    | Pathogenic                                                      | PVS1, PM4                                        |
| 145 | HCM          | 53 | M | <i>JPH2</i> A405T                                                                  | No                                                                                                                                                                      | Yes (J Mol Cell Cardiol 2007;42(6):1026-35                                                                                                                                                                                                            | 6.61E-5             |                                                                                                                                                                              | Likely Pathogenic                                               | PS3, PP3, PP4                                    |
| 168 | LVH, TAA     | 48 | M | <i>ACTN2</i> N170H                                                                 | No                                                                                                                                                                      | For HCM (J Am Coll Cardiol 2010;55:1127-35)                                                                                                                                                                                                           | 3.29E-05            | N170I and N170fs also in EXAC none have clinical correlation in ClinVar, Brother has similar phenotype (TAA with LVH) untested at this time                                  | Uncertain Significance                                          | PP3                                              |
| 177 | HCM          | 28 | M | <i>TPM1</i> D254G                                                                  | Yes (ClinVar)                                                                                                                                                           | Yes (Ann Med. 2013; 45(1):85-90)                                                                                                                                                                                                                      | 0                   | Sister passed away at 13 – known HCM no genetic diagnosis, mother has variant and disease, ClinVar -2 submitters, likely pathogenic                                          | Likely Pathogenic                                               | PM2, PP1, PP3, PP4, PP5                          |
| 179 | HCM, syncope | 29 | M | <i>PRKAG2</i> T174M                                                                | Yes (ClinVar)                                                                                                                                                           | Yes (Hum Molec Genet 2001;10:1215-20)                                                                                                                                                                                                                 | 4.12E-05            | Also has ventricular arrhythmias, family history of SCD. ClinVar – Uncertain significance 1 submission                                                                       | Unknown Significance                                            | PP4                                              |
| 182 | HCM          | 54 | M | <i>TNNT2</i> A28V                                                                  | Yes (Eur J Med Genet 2011;54(6):e570-5)                                                                                                                                 | Yes for HCM (Cell 1994;77:701-12), For DCM (Eur J Med Genet 2011;54(6):e570-5)                                                                                                                                                                        | 0.0004868           | ClinVar – 3 uncertain significance submissions, 1 likely benign submission, 1 pathogenic submission. All reports for are DCM                                                 | Unknown Significance                                            | PP5, BP6                                         |
| 183 | HCM          | 50 | M |                                                                                    |                                                                                                                                                                         |                                                                                                                                                                                                                                                       |                     |                                                                                                                                                                              |                                                                 |                                                  |
| 184 | HCM          | 27 | M | <i>PRKAG2</i> R302P                                                                | No                                                                                                                                                                      | Yes (N Engl J Med 2001; 344(24):1823-31)                                                                                                                                                                                                              | 0                   | ClinVar has R302L – 5 submission all pathogenic, N Engl J Med reports R302Q as a segregating variant in a large family, reported binding site for ATP/AMP                    | Likely Pathogenic                                               | PM1, PM2, PM5, PP3                               |

## D) Dilated Cardiomyopathy (DCM)

| #   | Reason for Referral         | Age | Sex | Variant                | Variant Previously Reported?                         | Disease Association                                                                                                               | Freq. EXAC (January 2016) | Additional Information                                                                                                                                                                     | Pathogenicity                              | ACMG criteria*     |
|-----|-----------------------------|-----|-----|------------------------|------------------------------------------------------|-----------------------------------------------------------------------------------------------------------------------------------|---------------------------|--------------------------------------------------------------------------------------------------------------------------------------------------------------------------------------------|--------------------------------------------|--------------------|
| 18  | DCM                         | 38  | M   |                        |                                                      |                                                                                                                                   |                           |                                                                                                                                                                                            |                                            |                    |
| 22  | DCM                         | 30  | M   | DSP R866C              | Yes (http://www.ncbi.nlm.nih.gov/Default.aspx)       | Yes for ARVC (Circulation 2011;123(23):2690-2700)                                                                                 | 6.096E-4                  | Hotspot? R886H and R866L in EXAC; in clinical report of this mutation, several other mutations also found in LMNA, DES, MYBPC3, and MYH7, two independent labs call mutation likely benign | Likely Benign                              | BS3, BP6           |
| 39  | DCM                         | 32  | F   | RBM20 S1195Y           | Yes (ClinVar)                                        | Yes (Clin Tranl Sci 2010; 3(3): 90-7)                                                                                             | 6.661E-4                  | No segregation, but family DCM                                                                                                                                                             | Unknown Significance                       | PP3, PP4           |
| 45  | DCM                         | 59  | F   | DSG2 V239A             | Yes (ClinVar)                                        | Yes for ARVC (Circulation 2011;123(23):2701-9)                                                                                    | 9.14E-5                   |                                                                                                                                                                                            | Unknown Significance                       | PP3                |
| 66  | DCM                         | 28  | M   |                        |                                                      |                                                                                                                                   |                           |                                                                                                                                                                                            |                                            |                    |
| 88  | DCM                         | 29  | F   |                        |                                                      |                                                                                                                                   |                           |                                                                                                                                                                                            |                                            |                    |
| 95  | DCM                         | 56  | M   | MYBPC3 V1139I          | Yes(ClinVar)                                         | Yes (Circulation 2003; 107(17):2227-32)                                                                                           | 8.75E-5                   | 2 reports in ClinVar with unknown significance                                                                                                                                             | Unknown Significance                       | BP4                |
| 100 | DCM, Afib, bradycardia      | 47  | M   | MYH6 S1917P; MYH6 L24P | No; No                                               | Yes (Circulation 2005;112(1):54-9)                                                                                                | 0;0                       | L24I in EXAC (with 1 homozygote) and ClinVar, Uncertain significance                                                                                                                       | Unknown Significance; Unknown Significance | PM2, PP4; PM2, PP4 |
| 102 | DCM, Afib, bradycardia, VT  | 48  | M   |                        |                                                      |                                                                                                                                   |                           |                                                                                                                                                                                            |                                            |                    |
| 106 | DCM                         | 56  | F   | PRDM16 A34T; BAG3 P23S | No; No                                               | No related to 1p36 deletion (Am J Hum Genet 2013;93(1):67-77, PLoS One 2014;9(1):e85600); Yes (Am J Hum Genet 2011; 88(3):273-82) | 2.018E-3, 3.598e-5        | 1 homozygous in EXAC, Hot spot? A34V, A34G, and A34A all in EXAC; some debate about PRDM16 and disease - related to 1p36 deletion syndrome                                                 | Unknown Significance; Unknown Significance | PP3;PP3            |
| 107 | DCM                         | 54  | F   | HFE H63D               | Yes (ClinVar, Gastroenterology 2002; 122(3): 646-51) | Yes (Am J Hum Genet 1997;61(3):762-4)                                                                                             | 0.1066                    | Family known to have hemochromatosis                                                                                                                                                       | Pathogenic                                 | PS3, PP3, PP4, PP5 |
| 108 | DCM                         | 38  | M   | LMNA c.509 ins C       | No                                                   | Yes (Eur J Heart Fail 2013; 15(6):628-36)                                                                                         | 0                         | Other frameshifts reported to be deleterious                                                                                                                                               | Pathogenic                                 | PVS1, PM2, PM4     |
| 110 | DCM                         | 68  | F   | LMNA IVS3 - 10A>G      | No                                                   | Yes (Eur J Heart Fail 2013; 15(6):628-37)                                                                                         | 0                         | Other frameshifts reported to be deleterious                                                                                                                                               | Pathogenic                                 | PVS1, PM2, PM4     |
| 130 | DCM                         | 38  | F   |                        |                                                      |                                                                                                                                   |                           |                                                                                                                                                                                            |                                            |                    |
| 133 | DCM                         | 52  | M   |                        |                                                      |                                                                                                                                   |                           |                                                                                                                                                                                            |                                            |                    |
| 134 | DCM                         | 67  | M   |                        |                                                      |                                                                                                                                   |                           |                                                                                                                                                                                            |                                            |                    |
| 135 | DCM                         | 43  | F   |                        |                                                      |                                                                                                                                   |                           |                                                                                                                                                                                            |                                            |                    |
| 150 | DCM/family history SCD      | 57  | M   |                        |                                                      |                                                                                                                                   |                           |                                                                                                                                                                                            |                                            |                    |
| 151 | DCM/family history CHF      | 55  | F   |                        |                                                      |                                                                                                                                   |                           |                                                                                                                                                                                            |                                            |                    |
| 155 | DCM/CHF; family history CHF | 64  | F   | TMPO S444C; LAMA4 N89S | Yes (Circ Cardiovasc Genet 2013;6(4):337-46);        | Yes (Circ Cardiovasc Genet 2013;6(4):337-46); Yes(Circulation 2007;116(5):515-25)                                                 | 1.73E-04; 8.242e-06       | N89N in EXAC                                                                                                                                                                               | Likely Benign; Unknown Significance        | BS1, BP1; PM2, PP4 |

|     |     |    |   |                                   |                                                   |                                                                                    |                  |                                                                                                                                                                                                                                                                                                                      |                                                     |                        |
|-----|-----|----|---|-----------------------------------|---------------------------------------------------|------------------------------------------------------------------------------------|------------------|----------------------------------------------------------------------------------------------------------------------------------------------------------------------------------------------------------------------------------------------------------------------------------------------------------------------|-----------------------------------------------------|------------------------|
| 164 | DCM | 58 | M | TTN<br>c.48470delG;<br>MYH7 V964L | No; Yes<br>(ClinVar)                              | Yes (N Engl J Med 2012; 366(7): 619-28);<br>Yes (Clin Transl Sci 2008;1(1):21-6)   | 0; 8.236E-06     | TTN variant in A-band; father had heart transplant for cardiomyopathy; conflicting pathogenicity in ClinVar for MYH7 – 5 uncertain significance, one likely pathogenic; daughter has TTN variant                                                                                                                     | Pathogenic;<br>Uncertain<br>Significance            | IVS1, PM2; PP3,<br>PP5 |
| 180 | DCM | 57 | M | PRDM16 I302T;<br>SCNSA S216L      | No; Yes(Clin<br>Transl Sci<br>2008;1(1):21-<br>6) | Yes(Am J Hum Genet 2013; 93:67-77);Yes<br>for DCM (Clin Transl Sci 2008;1(1):21-6) | 8.384E-06; 0.001 | For SCNSA 1 homozygous person in EXAC, ClinVar – 5 submissions all uncertain significance, from Clin Transl Sci paper – 2 people with the same variant, no segregation, but highly conserved and changes charge, considered possible cause of disease, variant has been associated with LQTS and atrial fibrillation | Unknown<br>Significance;<br>Unknown<br>Significance | BP4; PP3               |
| 185 | DCM | 62 | F |                                   |                                                   |                                                                                    |                  |                                                                                                                                                                                                                                                                                                                      |                                                     |                        |
| 187 | DCM | 28 | F | PRKAG2 R84W                       | Yes (ClinVar)                                     | Yes (N Engl J Med 2001; 344(24):1823-31)                                           | 0.0002535        | Family history of cardiomyopathy, sudden death. ClinVar 1 submission uncertain significance, 2 submissions likely benign, R84Q also in ClinVar, uncertain significance                                                                                                                                               | Uncertain<br>Significance                           | PP3, PP4, BP6          |

### E) Familial Hypercholesterolemia (FH) and Lipo-dystrophy

| #   | Reason for Referral | Age | Sex | Variant         | Variant Previously Reported?                                                                                                 | Disease Association                                                                                                          | Freq. EXAC (January 2016) | Additional Information                                           | Pathogenicity     | ACMG criteria*     |
|-----|---------------------|-----|-----|-----------------|------------------------------------------------------------------------------------------------------------------------------|------------------------------------------------------------------------------------------------------------------------------|---------------------------|------------------------------------------------------------------|-------------------|--------------------|
| 1   | FH                  | 38  | M   |                 |                                                                                                                              |                                                                                                                              |                           |                                                                  |                   |                    |
| 89  | FH                  | 55  | F   |                 |                                                                                                                              |                                                                                                                              |                           |                                                                  |                   |                    |
| 91  | FH                  | 41  | M   |                 |                                                                                                                              |                                                                                                                              |                           |                                                                  |                   |                    |
| 92  | FH                  | 27  | F   | APOB R3500Q     | Yes (ClinVar, Hum Biol 2005; 77(5):663-73)                                                                                   | Yes (Hum Biol 2005; 77(5):663-73)                                                                                            | 2.311E-4                  | rs5742904, R3527Q, high total cholesterol, but no history of CAD | Likely Pathogenic | PS3, PP3, PP4, PP5 |
| 97  | FH, DVT             | 45  | M   | PLAT Y413H      |                                                                                                                              |                                                                                                                              |                           |                                                                  |                   |                    |
| 99  | FH                  | 42  | M   |                 |                                                                                                                              |                                                                                                                              |                           |                                                                  |                   |                    |
| 101 | FH                  | 38  | M   | apoE V254E      | Yes (ClinVar, Am J Hum Genet 1993;52(5)937-46)                                                                               | Yes (Am J Hum Genet 1993;52(5)937-46)                                                                                        | 1.35E-03                  | single submission in ClinVar - pathogenic                        | Pathogenic        | PS3, PP3, PP5      |
| 124 | FH                  | 64  | M   |                 |                                                                                                                              |                                                                                                                              |                           |                                                                  |                   |                    |
| 141 | FH/CAD              | 55  | F   | LDLR A431T      | Yes (Annu Rev Genet 1990;24:133-70)                                                                                          | Yes (Annu Rev Genet 1990;24:133-70)                                                                                          | 0                         | FH- Algeria                                                      | Pathogenic        | PS3, PM1, PP3      |
| 154 | FH/CAD              | 38  | F   | LDLR c.313+1G>A | Yes(Atherosclerosis 1994;111(2): 175-82, Am J Med Genet 1996;65(2):149-54, Arterioscler Thromb Vasc Biol 1995; 15(2):219-27) | Yes (Atherosclerosis 1994;111(2):175-82, Am J Med Genet 1996;65(2):149-54, Arterioscler Thromb Vasc Biol 1995; 15(2):219-27) | 4.12E-05                  | G>T also reported in EXAC                                        | Pathogenic        | PS1, PS3, PM1      |
| 166 | FH, xanthomas       | 48  | F   |                 |                                                                                                                              |                                                                                                                              |                           |                                                                  |                   |                    |
| 169 | FH                  | 49  | M   |                 |                                                                                                                              |                                                                                                                              |                           |                                                                  |                   |                    |
| 171 | FH                  | 25  | M   |                 |                                                                                                                              |                                                                                                                              |                           |                                                                  |                   |                    |

|     |                           |    |   |                        |                                              |                                                                                         |          |                                                                                |                      |                         |
|-----|---------------------------|----|---|------------------------|----------------------------------------------|-----------------------------------------------------------------------------------------|----------|--------------------------------------------------------------------------------|----------------------|-------------------------|
| 172 | FH                        | 52 | F |                        |                                              |                                                                                         |          |                                                                                |                      |                         |
| 191 | FH; Family History of SCD | 62 | M |                        |                                              |                                                                                         |          |                                                                                |                      |                         |
| 192 | FH                        | 33 | F | LDLR M1fs c.3delG      | No                                           | Yes (Cell 1985;41:735-43)                                                               | 0        | Maternal family history of hyperlipidemia without CAD                          | Pathogenic           | PVS1, PM2, PM4          |
| 198 | FH                        | 22 | M | LDLR I764fs c.2292delA | No                                           | Yes (Cell 1985;41:735-43)                                                               | 0        | Paternal family history of premature CAD, hypercholesterolemia                 | Pathogenic           | PVS1, PM2               |
| 5   | Lipo-dystrophy            | 56 | F |                        |                                              |                                                                                         |          |                                                                                |                      |                         |
| 71  | Lipo-dystrophy            | 41 | M | LMNA R644C             | Yes (Am J Med Genet A 2008;146A(12):1530-42) | Yes (Am J Med Genet A 2008;146A(12):1530-42)                                            | 1.243E-3 | Segregation in family, well-established mutation site with variable phenotypes | Likely Pathogenic    | PS3, PP3, PP4           |
| 87  | Lipo-dystrophy            | 33 | M | PLIN1 R23W             | No                                           | No radical mutations only (N Engl J Med 2011;364(8):740-8, Diabetes 2015;64(1):299-310) | 8.544E-4 | Radical mutations only reported so far; brother has similar phenotype          | Unknown Significance | BP1                     |
| 149 | Lipo-dystrophy            | 46 | F | LMNA R582C             | Yes (Eur J Endocrinol 2012;167(3):423-31)    | Yes (Eur J Endocrinol 2012;167(3):423-31)                                               | 0        | R582R in EXAC                                                                  | Pathogenic           | PS4, PM2, PP3, PP4, PP5 |

## F) Long QT Syndrome

| #   | Reason for Referral         | Age | Sex | Variant                         | Variant Previously Reported?                        | Disease Association                                                          | Freq. EXAC | Additional Information                                                                                                                      | Pathogenicity                    | ACMG criteria*           |
|-----|-----------------------------|-----|-----|---------------------------------|-----------------------------------------------------|------------------------------------------------------------------------------|------------|---------------------------------------------------------------------------------------------------------------------------------------------|----------------------------------|--------------------------|
| 24  | LQTS                        | 56  | F   |                                 |                                                     |                                                                              |            |                                                                                                                                             |                                  |                          |
| 28  | LQTS, syncope               | 56  | F   | AKAP9 Q3520H                    | No                                                  | Yes (Proc Natl Acad Sci USA 2007;104(52):20990-5)                            | 0          | Q3520Q in EXAC                                                                                                                              | Unknown Significance             | PM2, PP3                 |
| 43  | LQTS/AF                     | 57  | M   |                                 |                                                     |                                                                              |            |                                                                                                                                             |                                  |                          |
| 81  | LQTS, syncope               | 25  | F   |                                 |                                                     |                                                                              |            |                                                                                                                                             |                                  |                          |
| 82  | LQTS, syncope               | 28  | F   | ANK2 V3634I                     | Yes (ClinVar, Heart Rhythm 2005;2(11):1218-23)      | Yes (Heart Rhythm 2005;2(11):1218-23, Nature 2003;421:633-639)               | 3.30E-5    | V3634I reported in ClinVar pathogenic -one report, V3634D has conflicting pathogenicity in ClinVar                                          | Unknown Significance             | PP4, PP5                 |
| 96  | LQTS, palpitations          | 35  | F   | RBM20 D996Y, TTN c.32562 insAGA | Yes (ClinVar) Yes (Eur Heart J 2014;35(32):2165-73) | Yes (Clin Tranl Sci 2010; 3(3):90-7); Yes (N Engl J Med 2012; 366(7):619-28) | 0; 0       | RBM20 Reported once in ClinVar with unknown significance; TTN reported twice with familial and non-familial DCM/PPCM                        | Unknown Significance; Pathogenic | PM2, PP3; PVS1, PM2, PM4 |
| 126 | LQTS/AF/HCM                 | 70  | M   |                                 |                                                     |                                                                              |            |                                                                                                                                             |                                  |                          |
| 129 | LQTS                        | 34  | M   |                                 |                                                     |                                                                              |            |                                                                                                                                             |                                  |                          |
| 142 | LQTS, syncope               | 49  | F   |                                 |                                                     |                                                                              |            |                                                                                                                                             |                                  |                          |
| 153 | LQTS                        | 23  | F   |                                 |                                                     |                                                                              |            |                                                                                                                                             |                                  |                          |
| 162 | LQTS; Family history of SCD | 37  | F   | CTNNA3 H727R                    | No                                                  | Yes (Eur Heart J 2013;34(3):201-10)                                          | 0          | Brother drowned in ocean – military, patient had normal eMR                                                                                 | Unknown Significance             | PM2, PP3                 |
| 175 | LQTS                        | 24  | F   | CAV3 T78M                       | Yes (Circulation 2006; 114: 2104-2112)              | Yes (Circulation 2006; 114: 2104-2112)                                       | 0.003038   | 1 Homozygote in EXAC, ClinVar 5 benign/likely benign, 2 uncertain significance, 2 pathogenic, no other family members available for testing | Unknown Significance             | PP5, BP6                 |
| 181 | LQTS, syncope               | 52  | F   | ANK2 E1449G                     | Yes (Nature 2003;42(6923):634-9)                    | Yes (Nature 2003;42(6923):634-9 and Proc Natl Acad Sci 2004;101(24):9137-42) | 0.0004222  | ClinVar – 1 submission likely benign, 5 submissions likely pathogenic/pathogenic, in Nature paper segregation in family                     | Pathogenic                       | PS1, PS3, PP4, PP5       |
| 196 | LQTS, Family History SCD    | 67  | M   |                                 |                                                     |                                                                              |            |                                                                                                                                             |                                  |                          |



|     |      |    |   |             |                                                                                                   |                                                                                                  |   |                                                                                                                                                    |            |                         |
|-----|------|----|---|-------------|---------------------------------------------------------------------------------------------------|--------------------------------------------------------------------------------------------------|---|----------------------------------------------------------------------------------------------------------------------------------------------------|------------|-------------------------|
| 199 | LQTS | 57 | M | KCNQ1 L266P | Yes (Heart Rhythm 2005;2:507-517, Circulation 2007;115(19):2481-9, Heart Rhythm 2009;6:1297-1303) | Yes (Heart Rhythm 2005;2:507-517; Circulation 2007;115(19):2481-9 Heart Rhythm 2009;6:1297-1303) | 0 | History of syncope in childhood (near drowning), VF arrest, family history of SCD. L266P is known/established cause of LQTS, transmembrane variant | Pathogenic | PS4, PM2, PP3, PP4, PP5 |
|-----|------|----|---|-------------|---------------------------------------------------------------------------------------------------|--------------------------------------------------------------------------------------------------|---|----------------------------------------------------------------------------------------------------------------------------------------------------|------------|-------------------------|

### G) Atrial and/or Ventricular Arrhythmias

| #   | Reason for Referral                                  | Age | Sex | Variant      | Variant Previously Reported? | Disease Association                                                                           | Freq. EXAC (January 2016) | Additional Information                                                                                                                            | Pathogenicity        | ACMG criteria* |
|-----|------------------------------------------------------|-----|-----|--------------|------------------------------|-----------------------------------------------------------------------------------------------|---------------------------|---------------------------------------------------------------------------------------------------------------------------------------------------|----------------------|----------------|
| 56  | Atrial and Ventricular arrhythmias                   | 43  | F   | CACNB2 V255L | No                           | Yes for BrS and SCD (J Mol Cell Cardiol 2009; 46(5):695-703, Heart Rhythm 2010;7(12):1872-82) | 0                         |                                                                                                                                                   | Unknown Significance | PM2, PP3       |
| 60  | Atrial Arrhythmia                                    | 56  | F   |              |                              |                                                                                               |                           |                                                                                                                                                   |                      |                |
| 62  | Atrial Arrhythmia                                    | 66  | F   |              |                              |                                                                                               |                           |                                                                                                                                                   |                      |                |
| 64  | Atrial Arrhythmia                                    | 69  | M   | KCNE2 T8A    | Yes (ClinVar)                | Yes (Proc Natl Acad Sci U S A 2000;97(19):10613-18)                                           | 3.804E-3                  | May cause long QT when on antibiotic therapy (Proc Natl Acad Sci U S A 2000;97(19):10613-18) T8I in EXAC as well, all reports from ClinVar Benign | Unknown Significance | PS3, PP3, BP6  |
| 67  | Atrial Arrhythmia (SVT)                              | 41  | F   | ABCC9 I614T  | No                           | Yes (Nat Clin Pract Cardiovasc Med 2007;4:110-116, Circ Res 2013; 112(7):1059-72)             | 0                         |                                                                                                                                                   | Unknown Significance | PP3            |
| 73  | Atrial Arrhythmia                                    | 22  | M   |              |                              |                                                                                               |                           |                                                                                                                                                   |                      |                |
| 15  | VT/Family History SCD                                | 33  | F   | SYNE2 E497V  | No                           | Yes (Hum Mol Genet 2007; 16(23): 2816-33)                                                     | 0                         | GWAS identified SYNE2 loci for AF (Nat Genet 2012;44(6):670-5). Family history of SIDS, personal history of NSVT                                  | Unknown Significance | PM2, PP3       |
| 57  | Ventricular arrhythmia                               | 23  | F   | GPD1L R220H  | Yes (ClinVar)                | Yes (Hum Mutat 2009;30(9):1256-66)                                                            | 3.484E-4                  | R220C also in EXAC 2.49E-5, both reports in ClinVar as Likely Benign                                                                              | Likely Benign        | BP4, BP6       |
| 167 | VT, positive procainamide test, family history of VF | 57  | F   |              |                              |                                                                                               |                           |                                                                                                                                                   |                      |                |
| 189 | VT/Family History of SCD                             | 22  | M   |              |                              |                                                                                               |                           |                                                                                                                                                   |                      |                |

### H) Brugada syndrome

| #  | Reason for Referral         | Age | Sex | Variant     | Variant Previously Reported?           | Disease Association                               | Freq. EXAC (January 2016) | Additional Information                                                                                                                                                               | Pathogenicity        | ACMG criteria*     |
|----|-----------------------------|-----|-----|-------------|----------------------------------------|---------------------------------------------------|---------------------------|--------------------------------------------------------------------------------------------------------------------------------------------------------------------------------------|----------------------|--------------------|
| 9  | BrS                         | 55  | F   |             |                                        |                                                   |                           |                                                                                                                                                                                      |                      |                    |
| 48 | BrS                         | 63  | F   |             |                                        |                                                   |                           |                                                                                                                                                                                      |                      |                    |
| 61 | BrS, AF                     | 53  | M   |             |                                        |                                                   |                           |                                                                                                                                                                                      |                      |                    |
| 69 | BrS                         | 23  | F   | SCN5A S910L | Yes (Nat Rev Cardiol 2009;6(5):337-48) | Yes(Heart Rhythm 2010;7(1):33-46)                 | 0                         | S910S in EXAC; known BrS variant                                                                                                                                                     | Likely Pathogenic    | PS3, PM2, PP3, PP4 |
| 72 | BrS                         | 37  | M   | SCN5A I786V | No                                     | Yes(Heart Rhythm 2010;7(1):33-46)                 | 0                         | I786I in EXAC                                                                                                                                                                        | Unknown Significance | PP3                |
| 78 | BrS (Family history of SCD) | 40  | F   | DSP V2388I  | No                                     | Yes for ARVC (Circulation 2011;123(23):2690-2700) | 1.65E-05                  | Mom, Sister, Niece all have this variant, no one has cMRI indicative of CM, index case does not have ARVC, "low normal LVEF" on cMRI/echo, family hx of SCD, but autopsy shows no CM | Unknown Significance | PP3                |

|     |     |    |   |                                                 |                                                              |                                                                                                                                                                         |              |                                                                                   |                                                 |                     |
|-----|-----|----|---|-------------------------------------------------|--------------------------------------------------------------|-------------------------------------------------------------------------------------------------------------------------------------------------------------------------|--------------|-----------------------------------------------------------------------------------|-------------------------------------------------|---------------------|
| 115 | BrS | 64 | F | SCN5A c.2551insTG; MYBPC3 V896M; CACNA1C G2022R | Yes(ClinVar) : Yes( Am J Hum Genet 1999; 65(5):1308-1320; No | Yes (Heart Rhythm 2010;7(1):33-46); Yes (Proc Natl Acad Sci USA 2005;102(23):8089-96); Yes (Circulation 2003; 107(17):2227-32)                                          | 0; 0.1275; 0 | F851L in ClinVar - Pathogenic; V896M - homozygote in EXAC                         | Pathogenic; Likely Benign; Unknown Significance | IVS1; BP5, BP6; PM2 |
| 146 | BrS | 51 | M | RYR2 R1482H                                     | Yes(ClinVar)                                                 | Yes for LQTS (Heart Rhythm 2005; 2(10):1099-1105); Yes for CPVT with and without Atrial Fibrillation (Can J Cardiol 2013;29(8):993-6, Heart Rhythm 2015;12(7):1636-43). | 1.994E-4     | R1482C in EXAC                                                                    | Likely Pathogenic                               | PS3, PM5, BP4       |
| 194 | BrS | 49 | M | RYR2 R1482H                                     | Yes(ClinVar)                                                 | Yes for LQTS (Heart Rhythm 2005; 2(10):1099-1105); Yes for CPVT with and without Atrial Fibrillation (Can J Cardiol 2013;29(8):993-6, Heart Rhythm 2015;12(7):1636-43). | 0.0001994    | R1482C in EXAC, ClinVar – 3 submissions 1 likely benign, 2 uncertain significance | Uncertain Significance                          | BP4                 |

### I) Family History of SCD or LQTS

| #   | Reason for Referral                         | Age | Sex | Variant                     | Variant Previously Reported?                | Disease Association                                                                                                                      | Freq. EXAC (January 2016) | Additional Information                                                                                                                                                             | Pathogenicity                              | ACMG criteria*     |
|-----|---------------------------------------------|-----|-----|-----------------------------|---------------------------------------------|------------------------------------------------------------------------------------------------------------------------------------------|---------------------------|------------------------------------------------------------------------------------------------------------------------------------------------------------------------------------|--------------------------------------------|--------------------|
| 3   | Family history SCD                          | 59  | M   | TMEM43 V364M                | No                                          | Yes for ARVC (Eur Heart J 2013; 34(13):1002-11)                                                                                          | 8.24E-5                   | No ARVC phenotype - normal cMRI. Family history of SCD                                                                                                                             | Unknown Significance                       | PP2                |
| 14  | Family history SCD                          | 45  | F   |                             |                                             |                                                                                                                                          |                           |                                                                                                                                                                                    |                                            |                    |
| 49  | Family history SCD; presyncope/palpitations | 55  | F   | SCN5A R1192Q; SCN4B G8S     | Yes (ClinVar); Yes (ClinVar)                | Yes(Heart Rhythm 2010;7(1):33-46); Circulation 2007; 116(2):134-42                                                                       | 6.215E-3; 4.742E-4        | R1192W and R1192R, R1192Q has 17 homozygotes, reports in ClinVar vary for SCN5A variant, SCN5A called polymorphism in 2 papers; SCN4B reported likely benign by one lab in ClinVar | Likely Benign; Unknown Significance        | BP4, BP6; BP4, BP6 |
| 80  | Family history of LQTS                      | 45  | M   |                             |                                             |                                                                                                                                          |                           |                                                                                                                                                                                    |                                            |                    |
| 116 | Family history of SCD, VT                   | 67  | M   | DES K109N                   | No                                          | Yes for myopathy with arrhythmias (Nat Genet 1998;19(4):402-3)                                                                           | 0                         | 1st amino acid in the rod domain, E108K is reported to cause DCM (Circulation 2007;115(10):1244-51)                                                                                | Likely Pathogenic                          | PM1,PM2, PP3, PP4  |
| 120 | Family history SCD                          | 45  | M   |                             |                                             |                                                                                                                                          |                           |                                                                                                                                                                                    |                                            |                    |
| 128 | Family history SCD, TWI on EKG              | 60  | F   | CACNA1C W1612C; TNNI3 R141Q | No; Yes (Circulation 2003; 107(17):2227-32) | Yes (Proc Natl Acad Sci USA 2005;102(23):8089-96); Yes (Circulation 2003; 107(17):2227-32)                                               | 0; 0                      | CACNA1C W1612X in EXAC; TNNI3 R141W in EXAC and ClinVar - 1 report, predicted likely pathogenic, unclear if R141Q causes disease                                                   | Unknown Significance; Unknown Significance | PM2; PM2, PP3, PP5 |
| 161 | Family history SCD/LQTS                     | 60  | M   | ANK2 M3649V; DSG2 A308S     | No; No                                      | Yes (Nature 2003;421:634-9); Yes for ARVC (Circulation 2006;113:1171-9)                                                                  | 9.893E-05; 0              | Brother has ANK2 variant and had SCD; DSG2 variant in Cadherin 3 domain, next to glycosylation site (N309), patient had normal cMR                                                 | Unknown Significance; Unknown Significance | PP1, BP4; PM2, PP3 |
| 174 | Family history SCD                          | 31  | M   | MYH6 R1398Q; VCL R502Q      | Yes (ClinVar); No                           | For cardiomyopathy (Circulation 2005;112(1):54-9); For cardiomyopathy (Circulation 2002;105:431-7, Biophys Res Commun 2006;345:998-1003) | 0.00003879;8.514E-05      | VCL R502W and R502R in EXAC, patient had normal imaging studies                                                                                                                    | Unknown Significance; Unknown Significance | BP5;BP5            |

### J) Non-specific NICM

| #   | Reason for Referral                              | Age | Sex | Variant                                      | Variant Previously Reported? | Disease Association                                                                                             | Freq. EXAC (January 2016) | Additional Information                                                                                                                                                                           | Pathogenicity                                          | ACMG criteria*                |
|-----|--------------------------------------------------|-----|-----|----------------------------------------------|------------------------------|-----------------------------------------------------------------------------------------------------------------|---------------------------|--------------------------------------------------------------------------------------------------------------------------------------------------------------------------------------------------|--------------------------------------------------------|-------------------------------|
| 111 | Non-Specific NICM, primary conduction disease CM | 58  | F   | LAMP2 T196S                                  | Yes (ClinVar)                | Yes (Neuromuscul Disord 2005;16(5):409-11)                                                                      | 2.393E-4                  | Two reports in ClinVar - one likely benign, one uncertain significance                                                                                                                           | Unknown Significance                                   | BP6                           |
| 114 | Non-Specific NICM, VT                            | 34  | F   | LDB3 c.287insC; TTN IVS100-2A>C; MYH6 A1004S | No; No; Yes(ClinVar)         | No (Clin Transl Sci 2008;1(1):21-6); Yes (N Engl J Med 2012; 366(7):619-28); Yes (Circulation 2005;112(1):54-9) | 0; 0; 9.801E-4            | ClinVar has LDB3 c.287T>C likely benign, only missense reported in the literature. Unclear if radical mutation has an effect. MYH6 mutation reported in OMIM, but conflicting reports in ClinVar | Unknown Significance; Pathogenic; Unknown Significance | PM2; PVS1, PM2, PM4; PP5, BP6 |

|     |                                                               |    |   |                                                      |                                             |                                                                                                                                                                                               |                                 |                                                                                                                                                                                                                                                                                            |                                                          |                          |
|-----|---------------------------------------------------------------|----|---|------------------------------------------------------|---------------------------------------------|-----------------------------------------------------------------------------------------------------------------------------------------------------------------------------------------------|---------------------------------|--------------------------------------------------------------------------------------------------------------------------------------------------------------------------------------------------------------------------------------------------------------------------------------------|----------------------------------------------------------|--------------------------|
| 122 | Non-Specific NICM, Atrial Arrhythmias, Neuromuscular Disorder | 33 | M | RYR2 R3260W                                          | No                                          | Yes (Heart Rhythm 2015;12(7):1636-43)                                                                                                                                                         | 4.15E-5                         | R3260Q in EXAC (with 1 homozygote)                                                                                                                                                                                                                                                         | Unknown Significance                                     | PP4                      |
| 125 | Non-Specific NICM                                             | 23 | M | MIB1 R676X                                           | No                                          | Yes for LVNC (Nat Med 2013;19(2):193-201)                                                                                                                                                     | 0                               | EXAC has c.2556delC (same location) and in ClinVar as well - reported pathogenic                                                                                                                                                                                                           | Pathogenic                                               | PVS1, PM2, PM4           |
| 195 | Non-Specific NICM/LQT                                         | 45 | F | PKP2 IVS6-1C>T(c.1379-1C>T; NEXN M540V; AKAP9 R3734P | Yes (ClinVar); Yes (ClinVar); Yes (ClinVar) | Yes for ARVC(Nature Genet 2004;36:1162-4); Yes for DCM (Nature Med 2009;15:1281-8); Yes for HCM(Acta Biochim Biophys Sinica 2001;33:19-24); Yes for LQTS (Proc Nat Acad Sci 2007;104:20990-5) | 0.0001499; 0.0004253; 0.0007003 | PKP2 – ClinVar single submission uncertain significance, high confidence LoF variant EXAC; NEXN Clin Var – 2 submissions 1 likely benign, 1 uncertain significance; AKAP9 in ClinVar 3 submissions all benign/likely benign, R3742Q also in ClinVar 3 submission all benign/likely benign; | Likely Pathogenic; Uncertain Significance; Likely Benign | PVS1, PM4; BP4; BP4, BP6 |
| 200 | Non-Specific NICM, VT                                         | 32 | M | DSG2 L836V                                           | No                                          | Yes (Mol Genet Metab 2008;95:74-80)                                                                                                                                                           | 0                               |                                                                                                                                                                                                                                                                                            | Unknown Significance                                     | PM2, PP3                 |

## K) Other

| #   | Reason for Referral          | Age | Sex | Variant                     | Variant Previously Reported?                    | Disease Association                                                                                        | Freq. EXAC (January 2016) | Additional Information                                                                                                                                                                            | Pathogenicity                    | ACMG criteria*           |
|-----|------------------------------|-----|-----|-----------------------------|-------------------------------------------------|------------------------------------------------------------------------------------------------------------|---------------------------|---------------------------------------------------------------------------------------------------------------------------------------------------------------------------------------------------|----------------------------------|--------------------------|
| 40  | ARVC (family history of SCD) | 60  | M   | DSP R1458G                  | Yes (http://www.arvcdatabase.info/Default.aspx) | Yes for ARVC (Circulation 2011;123(23):2690-2700)                                                          | 1.737E-3                  | 1 homozygous in EXAC, hotspot R1458R, R1458X, R1458Q all reported at least once in EXAC, Other reports of this mutation have people with other mutations compound heterozygous or other ARVC gene | Likely Benign                    | BP2, BP4, BP6            |
| 25  | CPVT                         | 48  | F   |                             |                                                 |                                                                                                            |                           |                                                                                                                                                                                                   |                                  |                          |
| 17  | Heart Block (familial)       | 64  | M   |                             |                                                 |                                                                                                            |                           |                                                                                                                                                                                                   |                                  |                          |
| 35  | PPCM                         | 40  | F   | NDUFV2 Q31X                 | No                                              | Yes for HCM (Hum Mutat 2003; 21(6):582-6)                                                                  | 0                         | few reported mutations in ClinVar, similar mutation type with HCM                                                                                                                                 | Likely Pathogenic                | PM2, PM4, PP3, PP4       |
| 109 | PPCM                         | 56  | F   | EMD c.110_112del AGA        | No                                              | Yes for Emery-Dreifuss MD (Nat Genet 1994;8(4):323-327); mild features with DCM (BMC Med Genet 2014;15:77) | 2.53E-05                  | No musculoskeletal features -- potentially very mild?                                                                                                                                             | Likely Pathogenic                | PVS1, PM4                |
| 113 | RCM, VT/AF                   | 15  | M   | TNNI7 ΔGlu160; SCN5A R1027Q | Yes(N Engl J Med 1995;232(16):1058-64;No        | Yes(N Engl J Med 1995;232(16):1058-64;Yes(Heart Rhythm 2010;7(1):33-46)                                    | 0; 5.059E-5               |                                                                                                                                                                                                   | Pathogenic; Unknown Significance | PVS1, PM2, PM4; PP5, PB5 |

\* Abbreviations for the ACMG Criteria: PVS – Pathogenic Very Strong, PS – Pathogenic Strong, PM – Pathogenic Moderate, PP – Pathogenic Supporting, BS – Benign Strong, BP – Benign Supporting

Other Abbreviations: TAA – Thoracic Aortic Aneurysm, AAA – Abdominal Aortic Aneurysm, PVH – Periventricular Heterotopia, EDS – Ehlers Danlos Syndrome, SCAD – Spontaneous Coronary Artery Disease, SCD – Sudden Cardiac Death, RCM – Restrictive Cardiomyopathy, HCM- Hypertrophic Cardiomyopathy, DCM – Dilated Cardiomyopathy, Non-Specific NICM – Non-Ischemic Cardiomyopathy, TdP – Torsade Des Pointes LQTS – Long QT Syndrome, ARVC – Arrhythmogenic Right Ventricular Cardiomyopathy, CPVT – Catecholaminergic Polymorphic Ventricular Tachycardia, LVH – Left Ventricular Hypertrophy, FH – Familial Hypercholesterolemia, CAD – Coronary Artery Disease, AF – Atrial Fibrillation, BrS – Brugada Syndrome, VT – Ventricular Tachycardia, VF- Ventricular Fibrillation, TWI on EKG – T-wave Inversion on Electrocardiogram, PPCM – Peripartum Cardiomyopathy

**Table S2: Pathogenic Variants Found with American College of Medical Genetics Data**

| #  | Reason for Referral                                                | Age | Sex | Variant                        | Variant Previously Reported?                    | Disease Association                                                                                               | Freq. EXAC (January 2016) | Additional Information                                                                                                                                                                 | Pathogenicity                 | ACMG criteria*                                     |
|----|--------------------------------------------------------------------|-----|-----|--------------------------------|-------------------------------------------------|-------------------------------------------------------------------------------------------------------------------|---------------------------|----------------------------------------------------------------------------------------------------------------------------------------------------------------------------------------|-------------------------------|----------------------------------------------------|
| 4  | SCD (RCM)                                                          | 54  | F   | TNNI3 L198V                    | Yes(ClinVar)                                    | Yes (Neth Heart J 2011; 19(7-8): 344-51)                                                                          | 0                         | Causes a change in splice site                                                                                                                                                         | Pathogenic                    | PM2, PM4, PP3, PP5                                 |
| 6  | EDS, PVH                                                           | 25  | F   | FLNA 4214delA;<br>COL5A2 G702R | No; No                                          | Yes (Neurology 2005;64(2):254-262;<br>Yes(J Med Genet 1998;35:846-8)                                              | 0;<br>1.663E-5            | Family segregation done Mom has COL5A2 with phenotype, maternal grandmother has COL5A2 with phenotype, FLNA de novo, sister has COL5A2 and phenotype, brother has COL5A2 and phenotype | Pathogenic; Likely Pathogenic | PS2, PM2, PM2, PP1(family well-characterized), PP3 |
| 8  | HCM                                                                | 60  | M   | TPM1 D175N                     | Yes (Ann Med. 2013; 45(1):85-90)                | Yes (Ann Med. 2013; 45(1):85-90)                                                                                  | 0                         |                                                                                                                                                                                        | Pathogenic                    | PS3, PP3, PP4, PP5                                 |
| 10 | HCM (apical variant), syncope, bradycardia, conduction abnormality | 73  | F   | TRPM4 Q752X                    | No                                              | No, only missense mutations reported (J Clin Invest 2009; 119(9):2737-44, Circ Cardiovasc Genet 2010;3(4):374-85) | 1.833E-3                  | Dominant negative mutations exist - D984A (J Biol Chem 2005;280(24):22899-906)                                                                                                         | Pathogenic                    | PVS1, PS3                                          |
| 12 | SCD                                                                | 66  | F   | KCNH2 N33T                     | No                                              | Yes (Circulation 2002; 105(7):794-9)                                                                              | 0                         | 2 submissions in ClinVar - Gene DX pathogenic, NHS VUS, this mutation increased rate of deactivation several papers; family segregation                                                | Pathogenic                    | PS3, PM1, PM2, PP3, PP5                            |
| 16 | Marfan syndrome                                                    | 26  | F   | FBN1 IVS2+1G>A                 | Yes (http://www.umd.be/FBN1/4DACTION/W_DMDT1/1) | Yes (Proc Natl Acad Sci USA 1992;89(13):5917-22)                                                                  | 0                         | Family has clinical phenotype... Brother, mother                                                                                                                                       | Pathogenic                    | PVS1, PM2, PM3                                     |
| 19 | SCD (HCM)                                                          | 58  | M   | MYBPC3 IVS28+22T>G             | No                                              | Yes (Circulation 2003; 107(17):2227-32)                                                                           | 0                         | Family segregation done - children without phenotype and do not carry mutation                                                                                                         | Pathogenic                    | PVS1, PM2, PP1, PP3                                |
| 26 | SCD (NICM)                                                         | 47  | F   | TTN R18966X                    | No                                              | Yes (N Engl J Med 2012; 366(7): 619-28)                                                                           | 0                         |                                                                                                                                                                                        | Pathogenic                    | PVS1, PM2, PM4                                     |
| 31 | Marfan syndrome                                                    | 55  | F   | FBN1 G77X                      | Yes(http://www.umd.be/FBN1/4DACTION/W_DMDT1/1)  | Yes (Proc Natl Acad Sci USA 1992;89 (13):5917-21)                                                                 | 0                         | Family has clinical phenotype                                                                                                                                                          | Pathogenic                    | PVS1, PM2, PM4                                     |
| 35 | PPCM                                                               | 40  | F   | NDUFV2 Q31X                    | No                                              | Yes for HCM (Hum Mutat 2003; 21(6): 582-6)                                                                        | 0                         | few reported mutations in ClinVar, similar mutation type with HCM                                                                                                                      | Likely Pathogenic             | PM2, PM4, PP3, PP4                                 |
| 46 | HCM                                                                | 57  | M   | MYBPC3 c.2554 2555insT         | No                                              | Yes (Circulation 2003; 107(17): 2227-32)                                                                          | 1.69E-5                   | Family segregation done - son has genotype and clinical disease                                                                                                                        | Pathogenic                    | PVS1, PM4, PP1                                     |
| 52 | HCM                                                                | 42  | M   | TNNT2 c.477delCTC              | No                                              | Yes(N Engl J Med 1995;232(16):1058-64)                                                                            | 0                         | Segregated with disease in NEJM paper                                                                                                                                                  | Pathogenic                    | PVS1, PM2, PM4                                     |
| 53 | HCM                                                                | 58  | M   | MYBPC3 V219L                   | No; Yes (ClinVar)                               | Yes (Circulation 2003; 107(17):2227-32)                                                                           | 0                         | V219F in EXAC - considered pathogenic in ClinVar                                                                                                                                       | Likely Pathogenic             | PM2, PM5, PP1, PP3                                 |
| 54 | SCD (DCM)                                                          | 47  | F   | DSP Q1672X                     | No                                              | Yes for ARVC (Can J Cardiol 2014;30(12):1655-61), For DCM (Genet Med 2014; 16(8):601-8)                           | 0                         |                                                                                                                                                                                        | Pathogenic                    | PVS1, PM2, PM4                                     |
| 59 | SCD (NICM)                                                         | 24  | F   | TTN c.45689delG;               | No                                              | Yes (N Engl J Med 2012; 366(7):619-28, Sci Transl Med 2015; 7(270):270ra6);                                       | 0                         | Segregation done on family - Dad does not carry TTN and has no phenotype, sister carries and has phenotype                                                                             | Pathogenic                    | PVS1, PM2, PM4                                     |

|     |                    |    |   |                      |                                                      |                                                                                                            |          |                                                                                                                                        |                                  |                     |
|-----|--------------------|----|---|----------------------|------------------------------------------------------|------------------------------------------------------------------------------------------------------------|----------|----------------------------------------------------------------------------------------------------------------------------------------|----------------------------------|---------------------|
| 65  | SCD                | 47 | F | SCN5A S216L          | Yes (ClinVar, Clin Transl Sci 2008;1(1):21-26);      | Yes (Heart Rhythm 2010;7(1):33-46)                                                                         | 0.001    |                                                                                                                                        | Likely Pathogenic                | PS3, PP3, PP4       |
| 69  | BrS                | 23 | F | SCN5A S910L          | Yes (Nat Rev Cardiol 2009;6(5):337-48)               | Yes(Heart Rhythm 2010;7(1):33-46)                                                                          | 0        | S910S in EXAC; known BrS variant                                                                                                       | Likely Pathogenic                | PS3, PM2, PP3, PP4  |
| 71  | Lipo-dystrophy     | 41 | M | LMNA R644C           | Yes (Am J Med Genet A 2008;146A(12):1530-42)         | Yes (Am J Med Genet A 2008;146A(12):1530-42)                                                               | 1.243E-3 | Segregation in family, well-established mutation site with variable phenotypes                                                         | Likely Pathogenic                | PS3, PP3, PP4       |
| 75  | SCD (DCM)          | 40 | F | TTN c.29042-2A>C     | Yes(Sci Tranl Med 2015; 7(270):270ra6)               | Yes (N Engl J Med 2012; 366(7):619-28, Sci Tranl Med 2015; 7(270):270ra6)                                  | 0        | VF arrest                                                                                                                              | Pathogenic                       | PVS1, PM2, PM4      |
| 76  | HCM                | 62 | M | MYBPC3 R820Q         | Yes (ClinVar)                                        | Yes (Circulation 2003; 107(17):2227-32, J Am Coll Cardiol 2003 41(5):781-6)                                | 1.66E-5  | R820P and R820W also in ClinVar, both have uncertain significance, R820Q is pathogenic/likely pathogenic in ClinVar R820W also in EXAC | Pathogenic                       | PS3, PS4, PP5       |
| 84  | SCD (DCM)          | 40 | M | TTN W21280X          | No                                                   | Yes (N Engl J Med 2012; 366(7):619-28)                                                                     | 0        | Family segregation, Dad same phenotype and genotype                                                                                    | Pathogenic                       | PVS1, PM2, PM4, PP1 |
| 85  | Marfan syndrome    | 57 | F | FBNI R945C           | No                                                   | Yes (Genomics 1993;17(2):468-75)                                                                           | 0        | R954H in ClinVar as Pathogenic                                                                                                         | Likely Pathogenic                | PM2, PM5, PP3, PP4  |
| 86  | HCM                | 56 | M | MYBPC3 V398S         | No                                                   | Yes (Circulation 2003; 107(17):2227-32)                                                                    | 0        | V598Sfs is pathogenic in ClinVar single submission with clinical assertion information                                                 | Likely Pathogenic                | PM2, PP3, PP4       |
| 92  | FH                 | 27 | F | APOB R3500Q          | Yes (ClinVar, Hum Biol 2005; 77(5):663-73)           | Yes (Hum Biol 2005; 77(5):663-73)                                                                          | 2.311E-4 | rs5742904, R3527Q, high total cholesterol, but no history of CAD                                                                       | Likely Pathogenic                | PS3, PP3, PP4, PP5  |
| 96  | LQTS, palpitations | 35 | F | TTN c.32562 insAGA   | Yes (ClinVar)                                        | Yes (N Engl J Med 2012; 366(7):619-28)                                                                     | 0        | TTN reported twice with familial and non-familial DCM/PPCM                                                                             | Unknown Significance; Pathogenic | PVS1, PM2, PM4      |
| 101 | FH                 | 38 | M | apoE V254E           | Yes (ClinVar, Am J Hum Genet 1993;52(5)937-46)       | Yes (Am J Hum Genet 1993;52(5)937-46)                                                                      | 1.35E-03 | single submission in ClinVar - pathogenic                                                                                              | Pathogenic                       | PS3, PP3, PP5       |
| 107 | DCM                | 54 | F | HFE H63D             | Yes (ClinVar, Gastroenterology 2002; 122(3): 646-51) | Yes (Am J Hum Genet 1997;61(3):762-4)                                                                      | 0.1066   | Family known to have hemochromatosis                                                                                                   | Pathogenic                       | PS3, PP3, PP4, PP5  |
| 108 | DCM                | 38 | M | LMNA c.509 ins C     | No                                                   | Yes (Eur J Heart Fail 2013; 15(6):628-36)                                                                  | 0        | Other frameshifts reported to be deleterious                                                                                           | Pathogenic                       | PVS1, PM2, PM4      |
| 109 | PPCM               | 56 | F | EMD c.110_112del AGA | No                                                   | Yes for Emery-Dreifuss MD (Nat Genet 1994;8(4):323-327); mild features with DCM (BMC Med Genet 2014;15:77) | 2.53E-05 | No musculoskeletal features -- potentially very mild?                                                                                  | Likely Pathogenic                | PVS1, PM4           |
| 110 | DCM                | 68 | F | LMNA IVS3 - 10A>G    | No                                                   | Yes (Eur J Heart Fail 2013; 15(6):628-37)                                                                  | 0        | Other frameshifts reported to be deleterious                                                                                           | Pathogenic                       | PVS1, PM2, PM4      |

|     |                           |    |   |                                   |                                                                                                                                                             |                                                                                                                                                                         |          |                                                                                                           |                   |                     |
|-----|---------------------------|----|---|-----------------------------------|-------------------------------------------------------------------------------------------------------------------------------------------------------------|-------------------------------------------------------------------------------------------------------------------------------------------------------------------------|----------|-----------------------------------------------------------------------------------------------------------|-------------------|---------------------|
| 112 | HCM                       | 65 | F | <i>TNNT2</i> <i>ΔGlu160</i>       | Yes(N Engl J Med 1995;232(16):1058-64                                                                                                                       | Yes(N Engl J Med 1995;232(16):1058-64                                                                                                                                   | 0        |                                                                                                           | Pathogenic        | PVS1, PM2, PM4      |
| 113 | RCM, VT/AF                | 15 | M | <i>TNNT2</i> <i>ΔGlu160</i>       | Yes(N Engl J Med 1995;232(16):1058-64;No                                                                                                                    | Yes(N Engl J Med 1995;232(16):1058-64                                                                                                                                   | 0        |                                                                                                           | Pathogenic        | PVS1, PM2, PM4      |
| 114 | NICM, VT                  | 34 | F | <i>TTN</i> <i>IVS100-2A&gt;C;</i> | No                                                                                                                                                          | Yes (N Engl J Med 2012; 366(7):619-28                                                                                                                                   | 0        |                                                                                                           | Pathogenic        | PVS1, PM2, PM4; PP5 |
| 115 | BrS                       | 64 | F | <i>SCN5A</i> <i>c.2551insTG</i>   | Yes(ClinVar)                                                                                                                                                | Yes (Heart Rhythm 2010;7(1):33-46                                                                                                                                       | 0        | Pathogenic; V896M - homozygote in EXAC                                                                    | Pathogenic        | PVS1, PM2, PP5      |
| 116 | Family history of SCD, VT | 67 | M | <i>DES</i> <i>K109N</i>           | No                                                                                                                                                          | Yes for myopathy with arrhythmias (Nat Genet 1998;19(4):402-3)                                                                                                          | 0        | 1st amino acid in the rod domain, E108K is reported to cause DCM (Circulation 2007;115(10):1244-51)       | Likely Pathogenic | PM1,PM2, PP3, PP4   |
| 117 | HCM                       | 52 | M | <i>MYH7</i> <i>T1377M</i>         | Yes (Circulation 2003; 107(17):2227-32, J Cardiovasc Med (Hagerstown) 2006;7(8):601-17, J Am Coll Cardiol 2004;44(3):602-10, J Med Genet 2011; 48(8):572-6) | Yes (Circulation 2003; 107(17):2227-32, J Cardiovasc Med (Hagerstown) 2006;7(8):601-17, J Am Coll Cardiol 2004;44(3):602-10, J Med Genet 2011; 48(8):572-6)             | 0        | T1377M reported multiple cases of HCM without controls having mutations                                   | Pathogenic        | PS4, PM2, PP2, PP3  |
| 123 | HCM                       | 39 | F | <i>ABCC9</i> <i>IVS17-1G&gt;A</i> | No                                                                                                                                                          | Yes for DCM, (Nat Genet 2004;36:382-387)                                                                                                                                | 1.62E-3  | Splice prediction loss of exon 17, radical mutations reported elsewhere, but closer to c-terminal of gene | Likely Pathogenic | PVS1, PM4           |
| 125 | NICM                      | 23 | M | <i>MIB1</i> <i>R676X</i>          | No                                                                                                                                                          | Yes for LVNC (Nat Med 2013;19(2):193-201                                                                                                                                | 0        | EXAC has c.2556delC (same location) and in ClinVar as well - reported pathogenic                          | Pathogenic        | PVS1, PM2, PM4      |
| 141 | FH/CAD                    | 55 | F | <i>LDLR</i> <i>A431T</i>          | Yes (Annu Rev Genet 1990;24:133-70)                                                                                                                         | Yes (Annu Rev Genet 1990;24:133-70)                                                                                                                                     | 0        | FH- Algeria                                                                                               | Pathogenic        | PS3, PM1, PP3       |
| 145 | HCM                       | 53 | M | <i>JPH2</i> <i>A405T</i>          | No                                                                                                                                                          | Yes (J Mol Cell Cardiol 2007;42(6):1026-35                                                                                                                              | 6.61E-5  |                                                                                                           | Likely Pathogenic | PS3, PP3, PP4       |
| 146 | BrS                       | 51 | M | <i>RYR2</i> <i>R1482H</i>         | Yes(ClinVar)                                                                                                                                                | Yes for LQTS (Heart Rhythm 2005; 2(10):1099-1105); Yes for CPVT with and without Atrial Fibrillation (Can J Cardiol 2013;29(8):993-6, Heart Rhythm 2015;12(7):1636-43). | 1.994E-4 | R1482C in EXAC                                                                                            | Likely Pathogenic | PS3, PM5, BP4       |

|     |                             |    |   |                           |                                                                                                                             |                                                                                                                              |           |                                                                                                                                                           |                   |                         |
|-----|-----------------------------|----|---|---------------------------|-----------------------------------------------------------------------------------------------------------------------------|------------------------------------------------------------------------------------------------------------------------------|-----------|-----------------------------------------------------------------------------------------------------------------------------------------------------------|-------------------|-------------------------|
| 149 | Lipo-dystrophy              | 46 | F | <i>LMNA R582C</i>         | Yes (Eur J Endocrinol 2012;167(3):423-31)                                                                                   | Yes (Eur J Endocrinol 2012;167(3):423-31)                                                                                    | 0         | R582R in EXAC                                                                                                                                             | Pathogenic        | PS4, PM2, PP3, PP4, PP5 |
| 152 | Congenital hearing loss/TdP | 34 | F | <i>CACNA1D R1902X</i>     | No                                                                                                                          | Homozygous Inframe insertion (Nat Neurosci 2011;14(1):77-84);                                                                | 0         | Possible dominant negative effect                                                                                                                         | Likely Pathogenic | PM2, PM4, PM6, PP4      |
| 154 | FH/CAD                      | 38 | F | <i>LDLR c.313+1G&gt;A</i> | Yes(Atherosclerosis 1994;111(2):175-82, Am J Med Genet 1996;65(2):149-54, Arterioscler Thromb Vasc Biol 1995; 15(2):219-27) | Yes (Atherosclerosis 1994;111(2):175-82, Am J Med Genet 1996;65(2):149-54, Arterioscler Thromb Vasc Biol 1995; 15(2):219-27) | 4.12E-05  | G>T also reported in EXAC                                                                                                                                 | Pathogenic        | PS1, PS3, PM1           |
| 164 | DCM                         | 58 | M | <i>TTN c.48470delG</i>    | No                                                                                                                          | Yes (N Engl J Med 2012; 366(7): 619-28)                                                                                      | 0         | TTN variant in A-band; father had heart transplant for cardiomyopathy                                                                                     | Pathogenic        | IVS1, PM2, PM4          |
| 177 | HCM                         | 28 | M | <i>TPM1 D254G</i>         | Yes (ClinVar)                                                                                                               | Yes (Ann Med. 2013; 45(1):85-90)                                                                                             | 0         | Sister passed away at 13 – known HCM no genetic diagnosis, mother has variant and disease, ClinVar -2 submitters, likely pathogenic                       | Likely Pathogenic | PM2, PP1, PP3, PP4, PP5 |
| 181 | LQTS, syncope               | 52 | F | <i>ANK2 E1449G</i>        | Yes (Nature 2003;42(6923):634-9)                                                                                            | Yes (Nature 2003;42(6923):634-9 and Proc Natal Acad Sci 2004;101(24):9137-42)                                                | 0.0004222 | ClinVar – 1 submission likely benign, 5 submissions likely pathogenic/pathogenic, in Nature paper segregation in family                                   | Pathogenic        | PS1, PS3, PP4, PP5      |
| 184 | HCM                         | 27 | M | <i>PRKAG2 R302P</i>       | No                                                                                                                          | Yes (N Engl J Med 2001; 344(24):1823-31)                                                                                     | 0         | ClinVar has R302L – 5 submission all pathogenic, N Engl J Med reports R302Q as a segregating variant in a large family, reported binding site for ATP/AMP | Likely Pathogenic | PM1, PM2, PM5, PP3      |
| 192 | FH                          | 33 | F | <i>LDLR M1fs c.3delG</i>  | No                                                                                                                          | Yes (Cell 1985;41:735-43)                                                                                                    | 0         | Maternal family history of hyperlipidemia without CAD                                                                                                     | Pathogenic        | PVS1, PM2, PM4          |
| 193 | SCD                         | 54 | M | <i>TTN c.90223delG</i>    | No                                                                                                                          | Yes(N Engl J Med 2012; 366(7): 619-28)                                                                                       | 0         | Cardiac event was VF arrest, brother had cardiac arrest as well. TTN variant found in A band of gene                                                      | Pathogenic        | PVS1, PM2, PM4          |

|     |          |    |   |                                         |                                                                                                   |                                                                                                  |           |                                                                                                                                                    |                   |                         |
|-----|----------|----|---|-----------------------------------------|---------------------------------------------------------------------------------------------------|--------------------------------------------------------------------------------------------------|-----------|----------------------------------------------------------------------------------------------------------------------------------------------------|-------------------|-------------------------|
| 195 | NICM/LQT | 45 | F | <i>PKP2 IVS6-1C&gt;T(c.1379-1C&gt;T</i> | Yes (ClinVar)                                                                                     | Yes for ARVC(Nature Genet 2004;36:1162-4                                                         | 0.0001499 | PKP2 – ClinVar single submission uncertain significance, high confidence LoF variant EXAC                                                          | Likely Pathogenic | PVS1, PM4               |
| 198 | FH       | 22 | M | <i>LDLR 1764fs c.2292delA</i>           | No                                                                                                | Yes (Cell 1985;41:735-43)                                                                        | 0         | Paternal family history of premature CAD, hypercholesterolemia                                                                                     | Pathogenic        | PVS1, PM2, PM4          |
| 199 | LQTS     | 57 | M | <i>KCNQ1 L266P</i>                      | Yes (Heart Rhythm 2005;2:507-517, Circulation 2007;115(19):2481-9, Heart Rhythm 2009;6:1297-1303) | Yes (Heart Rhythm 2005;2:507-517; Circulation 2007;115(19):2481-9 Heart Rhythm 2009;6:1297-1303) | 0         | History of syncope in childhood (near drowning), VF arrest, family history of SCD. L266P is known/established cause of LQTS, transmembrane variant | Pathogenic        | PS4, PM2, PP3, PP4, PP5 |

\* Abbreviations for the ACMG Criteria: PVS – Pathogenic Very Strong, PS – Pathogenic Strong, PM – Pathogenic Moderate, PP – Pathogenic Supporting, BS – Benign Strong, BP – Benign Supporting

Other Abbreviations PVH – Periventricular Heterotopia, EDS – Ehlers Danlos Syndrome, SCD – Sudden Cardiac Death, RCM – Restrictive Cardiomyopathy, HCM- Hypertrophic Cardiomyopathy, DCM – Dilated Cardiomyopathy, NICM – Non-Ischemic Cardiomyopathy, TdP – Torsade Des Pointes LQTS – Long QT Syndrome, FH – Familial Hypercholesterolemia, CAD – Coronary Artery Disease, AF – Atrial Fibrillation, BrS – Brugada Syndrome, VT – Ventricular Tachycardia PPCM – Peripartum Cardiomyopathy



**Table S3:** Gene represented by various commercially available arrhythmia panels:

Ambry – RhythmFirst and RhythmNext (From [www.ambrygen.com](http://www.ambrygen.com) on January 21, 2016)

GeneDX – Arrhythmia panel (From [www.genedx.com](http://www.genedx.com) on January 21, 2016)

Invitae – Comprehensive Arrhythmia Panel with Optional Limited Evidence Genes (Marked as O)

(from [www.invitae.com](http://www.invitae.com) on January 21, 2016)

| Gene            | Ambry | GeneDX | Invitae |
|-----------------|-------|--------|---------|
| <i>ABCC9</i>    |       |        | X       |
| <i>ACTN2</i>    |       |        | X       |
| <i>AKAP9</i>    | X     | X      | O       |
| <i>ANK2</i>     | X     | X      | X       |
| <i>ANKRD1</i>   |       |        | O       |
| <i>CACNA1C</i>  | X     | X      | X       |
| <i>CACNA2D1</i> | X     |        | O       |
| <i>CACNB2</i>   | X     | X      | X       |
| <i>CALM1</i>    | X     |        | X       |
| <i>CALM2</i>    |       |        | X       |
| <i>CALM3</i>    |       |        | X       |
| <i>CASQ2</i>    | X     | X      | X       |
| <i>CAV3</i>     | X     | X      | X       |
| <i>CTNNA3</i>   |       |        | O       |
| <i>DES</i>      |       |        | X       |
| <i>DSC2</i>     | X     | X      | X       |
| <i>DSG2</i>     | X     | X      | X       |
| <i>DSP</i>      | X     | X      | X       |
| <i>EMD</i>      |       |        | X       |
| <i>GPDL1</i>    | X     | X      | X       |
| <i>HCN4</i>     | X     | X      | X       |
| <i>JUP</i>      | X     | X      | X       |
| <i>KCND3</i>    | X     |        | O       |
| <i>KCNE1</i>    | X     | X      | X       |
| <i>KCNE2</i>    | X     | X      | X       |
| <i>KCNE3</i>    | X     | X      | O       |
| <i>KCNE5</i>    |       |        | O       |
| <i>KCNH2</i>    | X     | X      | X       |
| <i>KCNJ2</i>    | X     | X      | X       |
| <i>KCNJ5</i>    |       | X      | O       |
| <i>KCNJ8</i>    | X     | X      | O       |
| <i>KCNQ1</i>    | X     | X      | X       |
| <i>LDB3</i>     |       |        | O       |
| <i>LMNA</i>     | X     |        | X       |
| <i>NKX2.5</i>   | X     | X      | X       |
| <i>PDLIM3</i>   |       |        | O       |
| <i>PKP2</i>     | X     | X      | X       |
| <i>PLN</i>      |       |        | X       |
| <i>PRKAG2</i>   |       |        | X       |
| <i>RANGRF</i>   |       | X      | O       |

|               |   |   |   |
|---------------|---|---|---|
| <i>RBM20</i>  |   |   | X |
| <i>RYR2</i>   | X | X | X |
| <i>SCN1B</i>  | X | X | O |
| <i>SCN2B</i>  |   |   | O |
| <i>SCN3B</i>  | X | X | O |
| <i>SCN4B</i>  | X | X | O |
| <i>SCN5A</i>  | X | X | X |
| <i>SCN10A</i> |   |   | O |
| <i>SLMAP</i>  |   |   | O |
| <i>SNTA1</i>  | X | X | O |
| <i>TBX5</i>   | X |   |   |
| <i>TGFB3</i>  | X |   | X |
| <i>TMEM43</i> | X | X | X |
| <i>TNNI3</i>  |   |   | X |
| <i>TNNT2</i>  |   |   | X |
| <i>TRPM4</i>  | X |   | O |
| <i>TRDN</i>   | X |   | X |
| <i>TTN</i>    |   |   | X |

---

**Table S4:** Genes represented by various commercially available cardiomyopathy panels

Ambry – CMNExt (From [www.ambrygen.com](http://www.ambrygen.com) on January 21, 2016)

GeneDX – Cardiomyopathy panel (From [www.genedx.com](http://www.genedx.com) on January 21, 2016)

Invitae – Comprehensive Cardiomyopathy Panel with Optional Limited Evidence Genes (Marked as O) and RASopathy genes for cardiomyopathy (Marked as R) (from [www.invitae.com](http://www.invitae.com) on January 21, 2016)

| Gene          | Ambry | GeneDX | Invitae |
|---------------|-------|--------|---------|
| <i>A2ML1</i>  |       |        | R       |
| <i>ABCC9</i>  | X     | X      | X       |
| <i>ACTC1</i>  | X     | X      | X       |
| <i>ACTN2</i>  | X     | X      | X       |
| <i>ALMS1</i>  |       |        | X       |
| <i>ANKRD1</i> | X     | X      | O       |
| <i>BAG3</i>   | X     | X      | X       |
| <i>BRAF</i>   |       | X      | R       |
| <i>CALR3</i>  |       |        | O       |
| <i>CAV3</i>   |       | X      | X       |
| <i>CBL</i>    |       |        | R       |
| <i>CRYAB</i>  | X     | X      | X       |
| <i>CSRP3</i>  | X     | X      | X       |
| <i>CTF1</i>   |       |        | O       |
| <i>CTNNA3</i> |       |        | O       |
| <i>DES</i>    | X     | X      | X       |
| <i>DMD</i>    | X     | X      | X       |
| <i>DSC2</i>   | X     | X      | X       |
| <i>DSG2</i>   | X     | X      | X       |
| <i>DSP</i>    | X     | X      | X       |
| <i>DTNA</i>   |       | X      | O       |
| <i>ELAC2</i>  |       |        | X       |
| <i>EMD</i>    | X     | X      | X       |
| <i>EYA4</i>   | X     |        | X       |
| <i>FHL1</i>   |       |        | X       |
| <i>FHL2</i>   |       |        | O       |
| <i>FKRP</i>   |       |        | X       |
| <i>FKTN</i>   | X     | X      | X       |
| <i>FXN</i>    | X     |        |         |
| <i>GATA4</i>  |       |        | O       |
| <i>GATA6</i>  |       |        | O       |
| <i>GATAD1</i> | X     | X      | O       |
| <i>GLA</i>    | X     | X      | X       |
| <i>HCN4</i>   |       |        | X       |
| <i>HRAS</i>   |       | X      | R       |
| <i>ILK</i>    |       | X      | O       |
| <i>JPH2</i>   | X     | X      | O       |
| <i>JUP</i>    | X     | X      | X       |

|               |   |   |   |
|---------------|---|---|---|
| <i>KRAS</i>   |   | X | R |
| <i>LAMA4</i>  | X | X | O |
| <i>LAMP2</i>  | X | X | X |
| <i>LDB3</i>   | X | X | O |
| <i>LMNA</i>   | X | X | X |
| <i>MAP2K1</i> |   | X | R |
| <i>MAP2K2</i> |   | X | R |
| <i>MTND1</i>  |   | X |   |
| <i>MTND5</i>  |   | X |   |
| <i>MTND6</i>  |   | X |   |
| <i>MTTD</i>   |   | X |   |
| <i>MTTG</i>   |   | X |   |
| <i>MTTH</i>   |   | X |   |
| <i>MTTI</i>   |   | X |   |
| <i>MTTK</i>   |   | X |   |
| <i>MTTL1</i>  |   | X |   |
| <i>MTTL2</i>  |   | X |   |
| <i>MTTM</i>   |   | X |   |
| <i>MTTQ</i>   |   | X |   |
| <i>MTTS1</i>  |   | X |   |
| <i>MTTS2</i>  |   | X |   |
| <i>MTO1</i>   |   |   | X |
| <i>MYBPC3</i> | X | X | X |
| <i>MYH6</i>   | X |   | O |
| <i>MYH7</i>   | X | X | X |
| <i>MYL2</i>   | X | X | X |
| <i>MYL3</i>   | X | X | X |
| <i>MYLK2</i>  |   |   | O |
| <i>MYOM1</i>  |   |   | O |
| <i>MYOZ2</i>  | X | X | O |
| <i>MYPN</i>   | X | X | O |
| <i>NEBL</i>   |   | X | O |
| <i>NEXN</i>   | X | X | O |
| <i>NRAS</i>   |   | X | R |
| <i>NF1</i>    |   |   | R |
| <i>NKX2.5</i> | X |   |   |
| <i>NPPA</i>   |   |   | O |
| <i>PDLIM3</i> |   | X | O |
| <i>PKP2</i>   | X | X | X |
| <i>PLN</i>    | X | X | X |
| <i>PRDM16</i> |   |   | O |
| <i>PRKAG2</i> | X | X | X |
| <i>PTPN11</i> | X | X | R |
| <i>RAF1</i>   | X | X | X |
| <i>RASA1</i>  |   |   | R |
| <i>RBM20</i>  | X | X | X |
| <i>RIT1</i>   |   |   | R |
| <i>RYR2</i>   | X | X | X |
| <i>SCN5A</i>  | X | X | X |
| <i>SDHA</i>   |   |   | X |
| <i>SGCD</i>   |   | X | X |
| <i>SHOC2</i>  |   |   | R |

|               |     |   |   |
|---------------|-----|---|---|
| <i>SOS1</i>   |     | X | R |
| <i>SPRED1</i> |     |   | R |
| <i>TAZ</i>    | X   | X | X |
| <i>TBX20</i>  | X   |   |   |
| <i>TCAP</i>   | X   | X | X |
| <i>TGFB3</i>  | X   |   | X |
| <i>TMEM43</i> | X   | X | X |
| <i>TMPO</i>   | X   | X | O |
| <i>TNNC1</i>  | X   | X | X |
| <i>TNNI3</i>  | X   | X | X |
| <i>TNNT2</i>  | X   | X | X |
| <i>TPM1</i>   | X   | X | X |
| <i>TTN</i>    | X** | X | X |
| <i>TTR</i>    |     | X | X |
| <i>TXNRD2</i> | X   |   | O |
| <i>VCL</i>    | X   | X | X |

---

\*\**TTN* optional for Ambry CMNext

**Table S5:** The Actionable Incidental Pathological findings

| Case | Reason for Referral      | Incidental Finding                | Mutation Previously Reported         | Ref | Additional Information                                                                                                                                   | Pathogenicity     | ACMG criteria*          |
|------|--------------------------|-----------------------------------|--------------------------------------|-----|----------------------------------------------------------------------------------------------------------------------------------------------------------|-------------------|-------------------------|
| 33   | Noonan Syndrome          | <i>MSH6</i><br>c.1352_1353insTCAG | No                                   | 1   | Mother early onset CRC (40s) - no genetic testing                                                                                                        | Pathogenic        | PVS1, PM2, PM4          |
| 63   | NICM                     | <i>BRCA2</i> R2505X               | Yes (ClinVar)                        | 2   | No family history, but family is mostly males and small structure; index case is male                                                                    | Pathogenic        | PVS1, PP3, PP5          |
| 79   | SCD (ARVC)               | <i>LDLR</i> Q254P                 | Yes                                  | 3   | <i>LDLR</i> variant - Reggio Emilia -2; family has known history of elevated LDL, not quantified, segregated with those known to have "high cholesterol" | Pathogenic        | PS3, PM2, PP1, PP3, PP5 |
| 93   | HCM                      | <i>BRCA2</i> IVS6-1delG           | No                                   | 2   | No family history, but family is mostly males; index case is male                                                                                        | Pathogenic        | PVS1, PM2, PM4          |
| 107  | DCM                      | <i>HFE</i> H63D                   | Yes                                  | 4   | Family history of hemochromatosis                                                                                                                        | Pathogenic        | PS3, PP1, PP3, PP4, PP5 |
| 133  | DCM                      | <i>FBNI</i> P1009R                | Yes (ClinVar)                        | 5   | No indication of Marfan syndrome                                                                                                                         | Likely Pathogenic | PS3, PP3, PP5           |
| 142  | LQTS, syncope            | <i>BRIP1/FANCJ</i> IVS3-2A>G      | No                                   | 6   | Maternal family history of disease - mother breast cancer and TAH at 30 years old                                                                        | Pathogenic        | PVS1, PM2, PM4          |
| 152  | Hearing loss and Torsade | <i>APC</i> IVS11-2A>C             | No                                   | 7   | Maternal family history of disease - mother colon polyps and CRC                                                                                         | Pathogenic        | PVS1, PM2, PM4          |
| 173  | TAA                      | <i>LDLR</i> G529E                 | Yes (ClinVar)                        | 8   | Variant known a FH Sicily, known personal/family history of hypercholesterolemia                                                                         | Pathogenic        | PS3, PS4, PP3           |
| 183  | HCM                      | <i>ATM</i> Q1852X                 | Yes (ClinVar)                        | 9   | Family history of female breast and pancreatic cancers and brain tumor                                                                                   | Pathogenic        | PVS1, PS4, PM4          |
| 195  | NICM                     | <i>SCNN1B</i> T594M               | Yes (Lancet 1998;351(9113):138 8-92) | 10  | Known variant for hypertension in individuals of African background                                                                                      | Pathogenic        | PS3 PS4, PP3, PP5       |

\* Abbreviations for the ACMG Criteria: PVS – Pathogenic Very Strong, PS – Pathogenic Strong, PM – Pathogenic Moderate, PP – Pathogenic Supporting, BS – Benign Strong, BP – Benign Supporting

## References:

1. Barnetson RA, Tenesa A, Farrington SM, Nicholl ID, Cetnarskyj R, Porteous ME, et al. Identification and survival of carriers of mutations in DNA mismatch-repair genes in colon cancer. *N Engl J Med.* 2006;354:2751-2763
2. Hakansson S, Johannsson O, Johannsson U, Sellberg G, Loman N, Gerdes AM, et al. Moderate frequency of *brca1* and *brca2* germ-line mutations in scandinavian familial breast cancer. *Am J Hum Genet.* 1997;60:1068-1078
3. Bertolini S, Cantafora A, Aversa M, Cortese C, Motti C, Martini S, et al. Clinical expression of familial hypercholesterolemia in clusters of mutations of the *ldl* receptor gene that cause a receptor-defective or receptor-negative phenotype. *Arterioscler Thromb Vasc Biol.* 2000;20:E41-52
4. Melis MA, Cau M, Deidda F, Barella S, Cao A, Galanello R. H63d mutation in the *hfe* gene increases iron overload in beta-thalassemia carriers. *Haematologica.* 2002;87:242-245
5. Dietz HC, McIntosh I, Sakai LY, Corson GM, Chalberg SC, Pyeritz RE, et al. Four novel *fbn1* mutations: Significance for mutant transcript level and egf-like domain calcium binding in the pathogenesis of marfan syndrome. *Genomics.* 1993;17:468-475
6. Seal S, Thompson D, Renwick A, Elliott A, Kelly P, Barfoot R, et al. Truncating mutations in the fanconi anemia *j* gene *brip1* are low-penetrance breast cancer susceptibility alleles. *Nat Genet.* 2006;38:1239-1241
7. Fodde R, Smits R, Clevers H. *Apc*, signal transduction and genetic instability in colorectal cancer. *Nature reviews. Cancer.* 2001;1:55-67
8. Hobbs, H. H. , Brown M.S., Goldstein JL. Molecular genetics of the LDL receptor gene in familial hypercholesterolemia. *Hum Mutat.* 1992;1: 445-66
9. Chen, P.C., Lavin, M.F., Kidson C., Moss, D. Identification of ataxia telangiectasia heterozygotes, a cancer prone population. *Nature.* 1978;274: 484-6
10. Baker, E.H., Dong, Y.B., Sangella, G.A., Rothwell, M., Onipinla, A.K., Mankandu N.D., *et al.* Association of hypertension with T594M mutation in beta subunit of epithelial sodium channels in black people resident in London. *Lancet.* 1998; 351:1388-92.

Figure S1: (A) Amplified CACNA1D RNA from a human ventricular biopsy on agarose gel. (B) Relative mRNA expression of CACNA1D compared to housekeeping gene GAPDH.

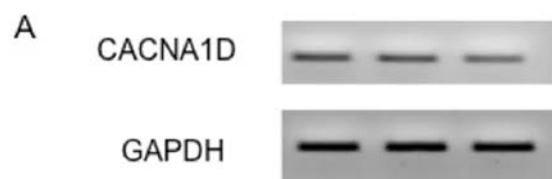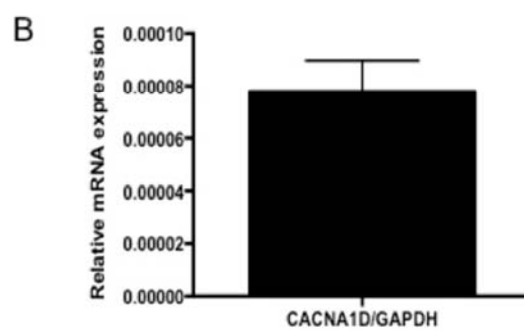

Supplement: NIHMS838176-supplement-001573_-_Supplemental_Material.pdf [file NIHMS838176-supplement-001573_-_Supplemental_Material.pdf]
